# Supplementary material for: Bound to the group and blinded by the leader: ideological leader–follower dynamics in a trust economic game
Source: PubMed Central journal article supplement (PMC6774964; doi:10.1098/rsos.182023), 2019-09-25
Supplement: rsos182023_review_history.pdf [file rsos182023_review_history.pdf]

## **Bound to the group and blinded by the leader: ideological leader–follower dynamics in a trust economic game**

Biljana Gjoneska, Marco Tullio Liuzza, Giuseppina Porciello, Gian Vittorio Caprara and Salvatore M. Aglioti

### **Article citation details**

*R. Soc. open sci.* **6**: 182023.

<http://dx.doi.org/10.1098/rsos.182023>

### **Review timeline**

Original submission: 7 April 2018  
1st revised submission: 30 November 2018  
2nd revised submission: 3 May 2019  
3rd revised submission: 20 August 2019  
Final acceptance: 22 August 2019

Note: Reports are unedited and appear as submitted by the referee. The review history appears in chronological order.

## Review History

### RSOS-180505.R0 (Original submission)

#### Review form: Reviewer 1

**Is the manuscript scientifically sound in its present form?**

Yes

**Are the interpretations and conclusions justified by the results?**

No

**Is the language acceptable?**

Yes

**Is it clear how to access all supporting data?**

Yes

**Do you have any ethical concerns with this paper?**

No

**Have you any concerns about statistical analyses in this paper?**

No

**Recommendation?**

Accept with minor revision (please list in comments)

**Comments to the Author(s)**

This manuscript compares the behavior of left-wing and right-wing voters in an economic trust game toward a well-known politician from the right (Berlusconi) and a well-known non-politician without a stated ideology (Angela). The authors find that left-wingers adjust their behavior toward both Angela and Berlusconi (the latter representing their political outgroup) as a function of the two figures' purported trustworthy vs. untrustworthy behavior. In contrast, right-wingers adjust their behavior toward Angela as a function of his trustworthy vs. untrustworthy behavior, but they do not adjust their behavior toward Berlusconi (their political ingroup) as a function of his trustworthiness. Right-wingers' consistent investment behavior toward Berlusconi is not reflected in their trustworthiness ratings of him, and it is suggested that their context-independent trust behavior toward Berlusconi can be attributed to heightened social conservatism and right-wing authoritarianism tendencies.

This is a well-written manuscript and it explores an interesting political question of when and how voters will trust and support politicians with valuable resources, which is relevant across many political contexts today. I also thought it was interesting to explore different facets of political preferences (MF, RWA, ESJ, SDO, SVO).

The use of the trust game for the purpose of this experiment is clear, but I have a few questions about the design that I believe could be clarified. First, I like the inclusion of a non-political figure as a control, but I was wondering why there was no left-wing politician included in the design. This seems important because the paper is framed as right-wingers "blindly" investing in their ingroup politicians whereas left-wingers do not, but the described study does not provide an opportunity to assess whether left-wingers would also "blindly" invest in their own ingroup politicians. I also think including a left-wing politician condition would increase the study's ecological validity. In the discussion section, it seems to be suggested that there was no equivalent left-wing politician to Berlusconi in Italy, so one was not included here. However, there are certainly known left-wing politicians in Italy, and excluding such a condition should at least be explained more. At minimum, if a left-wing politician condition cannot be included, I think the language about the ideological differences should be softened substantially.

Is it possible that Angela is perceived as a relatively left-wing figure, even if he is not a politician? On this point, it could be helpful to include ideological ratings of the two figures in addition to the other ratings in the SI "evaluation of trustees" table.

As a side point, I was also wondering if participants found the trustworthy and untrustworthy interactions with Berlusconi (and to a lesser extent, Angela) believable. I don't think this is critical to the manuscript, but is there any way to assess whether the trustworthy vs. untrustworthy conditions reflect subjects' preexisting perceptions of Berlusconi?

Could the measures used for the Explicit Political Orientation questionnaire be provided in the text? Considering this is the IV used in the primary analyses, I was hoping to understand how ideology was measured -- for example, was it a single self-placement item, a composite measure of different ideological dimensions, or a composite measure of positions on a variety of policies?

I think the model using the social conservatism factor is interesting and illuminates potential mechanisms by which the observed ideological differences may emerge. Would it be possible to include a similar model using the economic liberalism factor, perhaps in the SI? It seems a lost opportunity to measure these constructs, which likely also play a role in the economic behavior in this context, but not to explore them.

Finally, it would be helpful to include some discussion about the political implications of these results. It's not totally clear to me how one-to-one interactions and exchanges with political leaders are realistic, but perhaps the authors could consider other economic scenarios/games in which the investments are explicitly framed as donations and trustees' behavior is linked to some policy outcomes, for example.

## Review form: Reviewer 2

**Is the manuscript scientifically sound in its present form?**

No

**Are the interpretations and conclusions justified by the results?**

No

**Is the language acceptable?**

Yes

**Is it clear how to access all supporting data?**

Yes

**Do you have any ethical concerns with this paper?**

No

**Have you any concerns about statistical analyses in this paper?**

Yes

**Recommendation?**

Reject

### Comments to the Author(s)

I am not entirely sure what to make of this manuscript. It is interesting, but to me it seems more like a promising pilot study than a definitive study. I am not entirely sure what it means, psychologically (to research participants) to play a trust game with Berlusconi's "algorithm," but it does raise some intriguing questions. I am not convinced that such a strange situation really says much about "voter-leader interactions" (p. 7). My main concern, however, is that the sample is too small to support meaningful conclusions, and it is potentially problematic that there was no left-wing equivalent to Berlusconi included in the design of the experiment.

The final sample was  $N = 118$  (p. 4), and (before exclusions) there were 58 rightists and 63 leftists altogether. There were two between-participants experimental conditions, which means that there were roughly 24-32 (or less, after exclusions) participants in each condition. I am afraid that these numbers are just too small to warrant the drawing of conclusions about rightists and leftists

in Italy. I have not performed any power analyses, but I suspect that the study is dramatically under-powered.

Furthermore, the failure to include a left-wing equivalent to Berlusconi (like Romano Prodi) means that we cannot really tell whether there was an ideological asymmetry in terms of trust behavior. It is possible that leftist participants would persist in trusting Prodi, but it is also possible that they would not. Until this question is answered, it is not clear to me what we can conclude from this study.

There are other concerns I have as well. If I am reading things correctly, the Berlusconi condition was run many months before the control condition (Angela). This means that there is a confound between time (or season) and interaction partner.

I also have some questions about the results (and how to interpret them). Why were there no differences between leftists and rightists in terms of (a) how much they invested in Berlusconi vs. Angela (p. 5), and (b) explicit trustworthiness ratings of Berlusconi vs. Angela (p. 6)? I find these null results to be surprising, and they make interpretation of the behavioral results more difficult, in my judgment.

In terms of theoretical issues, I don't think that this paradigm can tell us anything about whether liberals and conservatives differ in terms of cognitive rigidity (p. 7). I also don't know what it has to do with moral foundations theory, except to the extent that the behavior is tapping into authoritarianism. I am unsure about the connection to gaze-attraction as well.

## Decision letter (RSOS-180505.R0)

31-May-2018

Dear Dr Gjoneska:

Manuscript ID RSOS-180505 entitled "In leaders we trust: right-wing electors blindly invest in their political leader in an economic trust game" which you submitted to Royal Society Open Science, has been reviewed. The comments from reviewers are included at the bottom of this letter.

In view of the criticisms of the reviewers, the manuscript has been rejected in its current form. However, a new manuscript may be submitted which takes into consideration these comments.

Please note that resubmitting your manuscript does not guarantee eventual acceptance, and that your resubmission will be subject to peer review before a decision is made.

You will be unable to make your revisions on the originally submitted version of your manuscript. Instead, revise your manuscript and upload the files via your author centre.

Once you have revised your manuscript, go to <https://mc.manuscriptcentral.com/rsos> and login to your Author Center. Click on "Manuscripts with Decisions," and then click on "Create a Resubmission" located next to the manuscript number. Then, follow the steps for resubmitting your manuscript.

Your resubmitted manuscript should be submitted by 28-Nov-2018. If you are unable to submit by this date please contact the Editorial Office.

Please note that Royal Society Open Science will introduce article processing charges for all new submissions received from 1 January 2018. Charges will also apply to papers transferred to Royal Society Open Science from other Royal Society Publishing journals, as well as papers submitted as part of our collaboration with the Royal Society of Chemistry (<http://rsos.royalsocietypublishing.org/chemistry>). If your manuscript is submitted and accepted for publication after 1 Jan 2018, you will be asked to pay the article processing charge, unless you request a waiver and this is approved by Royal Society Publishing. You can find out more about the charges at <http://rsos.royalsocietypublishing.org/page/charges>. Should you have any queries, please contact [openscience@royalsociety.org](mailto:openscience@royalsociety.org).

We look forward to receiving your resubmission.

Kind regards,  
Andrew Dunn  
Royal Society Open Science  
[openscience@royalsociety.org](mailto:openscience@royalsociety.org)

on behalf of Dr Molly Crockett (Associate Editor) and Antonia Hamilton (Subject Editor)  
[openscience@royalsociety.org](mailto:openscience@royalsociety.org)

Associate Editor Comments to Author (Dr Molly Crockett):

Dear Dr Gjoneska and colleagues,

I have now received comments from two expert reviewers. The comments from reviewers are included at the bottom of this letter.

In view of the criticisms of the reviewers, the manuscript has been rejected in its current form. However, a new manuscript may be submitted which takes into consideration these comments. In particular, we would be willing to consider a new manuscript that includes a larger sample size and a left-wing equivalent to Berlusconi as an additional control.

Reviewers' Comments to Author:

Reviewer: 1

Comments to the Author(s)

This manuscript compares the behavior of left-wing and right-wing voters in an economic trust game toward a well-known politician from the right (Berlusconi) and a well-known non-politician without a stated ideology (Angela). The authors find that left-wingers adjust their behavior toward both Angela and Berlusconi (the latter representing their political outgroup) as a function of the two figures' purported trustworthy vs. untrustworthy behavior. In contrast, right-wingers adjust their behavior toward Angela as a function of his trustworthiness vs. untrustworthy behavior, but they do not adjust their behavior toward Berlusconi (their political ingroup) as a function of his trustworthiness. Right-wingers' consistent investment behavior toward Berlusconi is not reflected in their trustworthiness ratings of him, and it is suggested that their context-independent trust behavior toward Berlusconi can be attributed to heightened social conservatism and right-wing authoritarianism tendencies.

This is a well-written manuscript and it explores an interesting political question of when and how voters will trust and support politicians with valuable resources, which is relevant across many political contexts today. I also thought it was interesting to explore different facets of political preferences (MF, RWA, ESJ, SDO, SVO).

The use of the trust game for the purpose of this experiment is clear, but I have a few questions about the design that I believe could be clarified. First, I like the inclusion of a non-political figure as a control, but I was wondering why there was no left-wing politician included in the design. This seems important because the paper is framed as right-wingers “blindly” investing in their ingroup politicians whereas left-wingers do not, but the described study does not provide an opportunity to assess whether left-wingers would also “blindly” invest in their own ingroup politicians. I also think including a left-wing politician condition would increase the study’s ecological validity. In the discussion section, it seems to be suggested that there was no equivalent left-wing politician to Berlusconi in Italy, so one was not included here. However, there are certainly known left-wing politicians in Italy, and excluding such a condition should at least be explained more. At minimum, if a left-wing politician condition cannot be included, I think the language about the ideological differences should be softened substantially.

Is it possible that Angela is perceived as a relatively left-wing figure, even if he is not a politician? On this point, it could be helpful to include ideological ratings of the two figures in addition to the other ratings in the SI “evaluation of trustees” table.

As a side point, I was also wondering if participants found the trustworthy and untrustworthy interactions with Berlusconi (and to a lesser extent, Angela) believable. I don’t think this is critical to the manuscript, but is there any way to assess whether the trustworthy vs. untrustworthy conditions reflect subjects’ preexisting perceptions of Berlusconi?

Could the measures used for the Explicit Political Orientation questionnaire be provided in the text? Considering this is the IV used in the primary analyses, I was hoping to understand how ideology was measured -- for example, was it a single self-placement item, a composite measure of different ideological dimensions, or a composite measure of positions on a variety of policies?

I think the model using the social conservatism factor is interesting and illuminates potential mechanisms by which the observed ideological differences may emerge. Would it be possible to include a similar model using the economic liberalism factor, perhaps in the SI? It seems a lost opportunity to measure these constructs, which likely also play a role in the economic behavior in this context, but not to explore them.

Finally, it would be helpful to include some discussion about the political implications of these results. It’s not totally clear to me how one-to-one interactions and exchanges with political leaders are realistic, but perhaps the authors could consider other economic scenarios/games in which the investments are explicitly framed as donations and trustees’ behavior is linked to some policy outcomes, for example.

Reviewer: 2

Comments to the Author(s)

I am not entirely sure what to make of this manuscript. It is interesting, but to me it seems more like a promising pilot study than a definitive study. I am not entirely sure what it means, psychologically (to research participants) to play a trust game with Berlusconi’s “algorithm,” but

it does raise some intriguing questions. I am not convinced that such a strange situation really says much about “voter-leader interactions” (p. 7). My main concern, however, is that the sample is too small to support meaningful conclusions, and it is potentially problematic that there was no left-wing equivalent to Berlusconi included in the design of the experiment.

The final sample was  $N = 118$  (p. 4), and (before exclusions) there were 58 rightists and 63 leftists altogether. There were two between-participants experimental conditions, which means that there were roughly 24-32 (or less, after exclusions) participants in each condition. I am afraid that these numbers are just too small to warrant the drawing of conclusions about rightists and leftists in Italy. I have not performed any power analyses, but I suspect that the study is dramatically under-powered.

Furthermore, the failure to include a left-wing equivalent to Berlusconi (like Romano Prodi) means that we cannot really tell whether there was an ideological asymmetry in terms of trust behavior. It is possible that leftist participants would persist in trusting Prodi, but it is also possible that they would not. Until this question is answered, it is not clear to me what we can conclude from this study.

There are other concerns I have as well. If I am reading things correctly, the Berlusconi condition was run many months before the control condition (Angela). This means that there is a confound between time (or season) and interaction partner.

I also have some questions about the results (and how to interpret them). Why were there no differences between leftists and rightists in terms of (a) how much they invested in Berlusconi vs. Angela (p. 5), and (b) explicit trustworthiness ratings of Berlusconi vs. Angela (p. 6)? I find these null results to be surprising, and they make interpretation of the behavioral results more difficult, in my judgment.

In terms of theoretical issues, I don't think that this paradigm can tell us anything about whether liberals and conservatives differ in terms of cognitive rigidity (p. 7). I also don't know what it has to do with moral foundations theory, except to the extent that the behavior is tapping into authoritarianism. I am unsure about the connection to gaze-attraction as well.

## Author's Response to Decision Letter for (RSOS-180505.R0)

See Appendix A.

## RSOS-182023.R0

### Review form: Reviewer 1

**Is the manuscript scientifically sound in its present form?**

No

**Are the interpretations and conclusions justified by the results?**

No

**Is the language acceptable?**

No

**Is it clear how to access all supporting data?**

Yes

**Do you have any ethical concerns with this paper?**

No

**Have you any concerns about statistical analyses in this paper?**

No

**Recommendation?**

Major revision is needed (please make suggestions in comments)

**Comments to the Author(s)**

I read the revised manuscript with interest, and I appreciate the authors' efforts to address previous comments on their original manuscript. Although I still think the study is interesting, I continue to have concerns about the design and the conclusions drawn from the results, and I think it would be ideal to address these.

First, I have given a great deal of thought to the authors' arguments regarding the exclusion of a left-wing politician, and I am still troubled by the lack of this condition. In the real world, it is virtually impossible to find politicians on the left and right who are equivalent on every conceivable dimension; that doesn't mean that there is no point in assessing reactions to existing politicians with appropriate consideration of the limitations. I appreciate the authors' stringent criteria for experimental control here, but the ecological validity they gain by including a real politician like Berlusconi is, to my mind, somewhat undermined by the exclusion of a politician across the aisle, such as the ones they identify, Prodi or Renzi. I don't think 100% recognition is necessary to be included, nor is complete political equivalence necessary. I think that the authors could make a much stronger case if they decided to include a condition with a left-wing politician and simply make adjustments (experimentally or statistically) based on the differences between Berlusconi and the left-wing politician. In addition, there are significant (and perhaps confounding) differences between Berlusconi and the non-politician control, Angela: the authors state that Berlusconi was perceived as quite polarizing, whereas Angela was perceived as popular and not very polarizing. This seems a more significant confounding difference to me than the visibility issue with respect to a potential left-wing politician condition.

Second, I don't think that my point about the implied asymmetry between right wing and left wing participants was a misunderstanding, as the authors state in their response. I understand the point they are trying to make that they do not mean to imply that left wingers do not blindly follow their leaders – just that right wingers seem to. However, there are many points in the manuscript that suggest an ideological asymmetry that I just don't think is supported by the data. For example, in the abstract, it is stated that "Results revealed that left-wing voters relied on the situation (trustee's behavior), while right-wing voters did not." This suggests an asymmetry between left wingers and right wingers, and it is not supported by the data – both left wingers and right wingers updated their investment behavior in response to the non-politician. (Indeed, I'm not even sure that it's fair to say that right-wingers are "blindly" following their leader; rather, it seems just as plausible that they are doing this strategically, since, as the authors point out, they are able to adjust their behavior in response to the non-politician.) Furthermore, much of the text suggests that the authors are exploring a balanced design (e.g., on p. 2: "we were able to capture the initial trust of LW vs. RW participants towards an in-group vs. out-group leader



(hence potential positive vs. negative bias toward him”), but the design simply tests an in-group politician for RW participants and an out-group politician for LW participants. At minimum, I think the language about the design and the parameters that are actually being tested would be better served with greater constraint and precision.

Finally, I had not noticed the seasonal confound of the conditions in this experiment in my initial review, but I think it would be helpful to see more explanation about why running the two conditions in totally different seasons is not a worrisome confound. If participants had been randomly assigned to condition within the same season of data collection, the authors would still not have had the concern that perceptions of Berlusconi would be changing. I think it would be helpful to demonstrate that there were no newsworthy events in terms of politics or entertainment during or between the two seasons of data collection that could have affected participants’ perceptions.

## Review form: Reviewer 3

**Is the manuscript scientifically sound in its present form?**

No

**Are the interpretations and conclusions justified by the results?**

No

**Is the language acceptable?**

Yes

**Is it clear how to access all supporting data?**

No

**Do you have any ethical concerns with this paper?**

No

**Have you any concerns about statistical analyses in this paper?**

No

**Recommendation?**

Major revision is needed (please make suggestions in comments)

**Comments to the Author(s)**

I highly commend the author's efforts at responding, thoroughly, to the reviewers' comments and concerns, addressing many of their points and making necessary clarifications. However, I really hoped that these clarifications or some remedies to serious methodological problems were remedied within the manuscript itself. I have a few recommendations below that hopefully will push this work forward:

(1) I recommend replicating the findings while, within the same experiment, randomly assigning participants to experimental and control groups.

(2) Within the experimental groups, I highly recommend using a group that has a LW leader as well. As such, the design will be a 3x2 (3 target ideology: right-wing, left-wing, control; 2 participant ideology: left-wing or right wing). Or, alternatively, and as guided by much research

on ideology in social psychology, I highly recommend that you treat ideology as a continuous variable. The authors provide reasoning as to why a matched LW target is not accessible, but any proxy may be possible-- they don't need to be exactly matched.

(3) I recommend that the authors provide power calculations to determine their sample sizes moving forward. A highly powered study could accommodate for some minute shortcomings in the design (e.g., a fully matched LW target). It would be a great stretch to talk about ideological symmetry or asymmetry without having targets across the ideological spectrum.

(4) It would also be important to state specific hypotheses that are clear and state to the point: specify clearly what the IV, DV, and covariates are to the reader. I was consistently lost in terms of what the vast collection of variables (such as ESJ, RWA, etc.) were doing in there, considering that the authors used the single-item political ideology measure as the IV in their analyses. The predictions were unclear, which made the results hard to follow.

(5) It would be important for the authors to completely flesh out why adjustment/trustworthiness were considered to be proxies for the "cognitive rigidity" concept. Their theoretical links could benefit from guided clarity. I read too many names of concepts and mechanisms and did not see how those were manipulated or measured in the study, or how they were related to the relationship between ideology and trust. The mechanisms were technically not directly tested, but were rather hypothesized. Maybe further studies could elaborate on the mechanisms.

I anticipate this work will be pushed in the right direction with a more refined design, more data, and clear mechanisms. This is an excellent starting point, and I wish the authors the best of luck moving forward!

## Decision letter (RSOS-182023.R0)

20-Feb-2019

Dear Dr Gjoneska,

The Subject Editor assigned to your paper ("In leaders we trust: right-wing electors blindly invest in their political leader in an economic trust game") has now received comments from reviewers. We would like you to revise your paper in accordance with the referee and Associate Editor suggestions which can be found below (not including confidential reports to the Editor). Please note this decision does not guarantee eventual acceptance.

Please submit a copy of your revised paper before 15-Mar-2019. Please note that the revision deadline will expire at 00.00am on this date. If we do not hear from you within this time then it will be assumed that the paper has been withdrawn. In exceptional circumstances, extensions may be possible if agreed with the Editorial Office in advance. We do not allow multiple rounds of revision so we urge you to make every effort to fully address all of the comments at this stage. If deemed necessary by the Editors, your manuscript will be sent back to one or more of the original reviewers for assessment. If the original reviewers are not available we may invite new reviewers.

To revise your manuscript, log into <http://mc.manuscriptcentral.com/rsos> and enter your Author Centre, where you will find your manuscript title listed under "Manuscripts with

Decisions." Under "Actions," click on "Create a Revision." Your manuscript number has been appended to denote a revision. Revise your manuscript and upload a new version through your Author Centre.

When submitting your revised manuscript, you must respond to the comments made by the referees and upload a file "Response to Referees" in "Section 6 - File Upload". Please use this to document how you have responded to each of the comments, and the adjustments you have made. In order to expedite the processing of the revised manuscript, please be as specific as possible in your response.

In addition to addressing all of the reviewers' and editor's comments please also ensure that your revised manuscript contains the following sections before the reference list:

- Ethics statement

If your study uses humans or animals please include details of the ethical approval received, including the name of the committee that granted approval. For human studies please also detail whether informed consent was obtained. For field studies on animals please include details of all permissions, licences and/or approvals granted to carry out the fieldwork.

- Data accessibility

It is a condition of publication that all supporting data are made available either as supplementary information or preferably in a suitable permanent repository. The data accessibility section should state where the article's supporting data can be accessed. This section should also include details, where possible of where to access other relevant research materials such as statistical tools, protocols, software etc can be accessed. If the data has been deposited in an external repository this section should list the database, accession number and link to the DOI for all data from the article that has been made publicly available. Data sets that have been deposited in an external repository and have a DOI should also be appropriately cited in the manuscript and included in the reference list.

If you wish to submit your supporting data or code to Dryad (<http://datadryad.org/>), or modify your current submission to dryad, please use the following link:  
<http://datadryad.org/submit?journalID=RSOS&manu=RSOS-182023>

- Competing interests

Please declare any financial or non-financial competing interests, or state that you have no competing interests.

- Authors' contributions

All submissions, other than those with a single author, must include an Authors' Contributions section which individually lists the specific contribution of each author. The list of Authors should meet all of the following criteria; 1) substantial contributions to conception and design, or acquisition of data, or analysis and interpretation of data; 2) drafting the article or revising it critically for important intellectual content; and 3) final approval of the version to be published.

All contributors who do not meet all of these criteria should be included in the acknowledgements.

We suggest the following format:

AB carried out the molecular lab work, participated in data analysis, carried out sequence alignments, participated in the design of the study and drafted the manuscript; CD carried out the statistical analyses; EF collected field data; GH conceived of the study, designed the study,

coordinated the study and helped draft the manuscript. All authors gave final approval for publication.

- Acknowledgements

Please acknowledge anyone who contributed to the study but did not meet the authorship criteria.

- Funding statement

Please list the source of funding for each author.

Once again, thank you for submitting your manuscript to Royal Society Open Science and I look forward to receiving your revision. If you have any questions at all, please do not hesitate to get in touch.

Kind regards,

Andrew Dunn

Royal Society Open Science Editorial Office

Royal Society Open Science

openscience@royalsociety.org

on behalf of Dr Antonia Hamilton (Subject Editor)

openscience@royalsociety.org

Associate Editor Comments to Author:

Thank you for resubmitting. The paper has been assessed by two reviewers, though, unfortunately, both identify a substantial number of matters that must be addressed before the paper could be considered acceptable for publication. With this in mind, we'd like you to revise the manuscript to address the reviewers' concerns. Please note that you will not be granted a second round of revisions, so do ensure you do all you can to resolve the reviewers' feedback: if they remain unsatisfied after revision, we will, with regret, be forced to reject the paper from further consideration.

Reviewer comments to Author:

Reviewer: 1

Comments to the Author(s)

I read the revised manuscript with interest, and I appreciate the authors' efforts to address previous comments on their original manuscript. Although I still think the study is interesting, I continue to have concerns about the design and the conclusions drawn from the results, and I think it would be ideal to address these.

First, I have given a great deal of thought to the authors' arguments regarding the exclusion of a left-wing politician, and I am still troubled by the lack of this condition. In the real world, it is virtually impossible to find politicians on the left and right who are equivalent on every conceivable dimension; that doesn't mean that there is no point in assessing reactions to existing politicians with appropriate consideration of the limitations. I appreciate the authors' stringent criteria for experimental control here, but the ecological validity they gain by including a real politician like Berlusconi is, to my mind, somewhat undermined by the exclusion of a politician across the aisle, such as the ones they identify, Prodi or Renzi. I don't think 100% recognition is necessary to be included, nor is complete political equivalence necessary. I think that the authors could make a much stronger case if they decided to include a condition with a left-wing politician and simply make adjustments (experimentally or statistically) based on the differences between

Berlusconi and the left-wing politician. In addition, there are significant (and perhaps confounding) differences between Berlusconi and the non-politician control, Angela: the authors state that Berlusconi was perceived as quite polarizing, whereas Angela was perceived as popular and not very polarizing. This seems a more significant confounding difference to me than the visibility issue with respect to a potential left-wing politician condition.

Second, I don't think that my point about the implied asymmetry between right wing and left wing participants was a misunderstanding, as the authors state in their response. I understand the point they are trying to make that they do not mean to imply that left wingers do not blindly follow their leaders – just that right wingers seem to. However, there are many points in the manuscript that suggest an ideological asymmetry that I just don't think is supported by the data. For example, in the abstract, it is stated that "Results revealed that left-wing voters relied on the situation (trustee's behavior), while right-wing voters did not." This suggests an asymmetry between left wingers and right wingers, and it is not supported by the data – both left wingers and right wingers updated their investment behavior in response to the non-politician. (Indeed, I'm not even sure that it's fair to say that right-wingers are "blindly" following their leader; rather, it seems just as plausible that they are doing this strategically, since, as the authors point out, they are able to adjust their behavior in response to the non-politician.) Furthermore, much of the text suggests that the authors are exploring a balanced design (e.g., on p. 2: "we were able to capture the initial trust of LW vs. RW participants towards an in-group vs. out-group leader (hence potential positive vs. negative bias toward him)"), but the design simply tests an in-group politician for RW participants and an out-group politician for LW participants. At minimum, I think the language about the design and the parameters that are actually being tested would be better served with greater constraint and precision.

Finally, I had not noticed the seasonal confound of the conditions in this experiment in my initial review, but I think it would be helpful to see more explanation about why running the two conditions in totally different seasons is not a worrisome confound. If participants had been randomly assigned to condition within the same season of data collection, the authors would still not have had the concern that perceptions of Berlusconi would be changing. I think it would be helpful to demonstrate that there were no newsworthy events in terms of politics or entertainment during or between the two seasons of data collection that could have affected participants' perceptions.

Reviewer: 3

Comments to the Author(s)

I highly commend the author's efforts at responding, thoroughly, to the reviewers' comments and concerns, addressing many of their points and making necessary clarifications. However, I really hoped that these clarifications or some remedies to serious methodological problems were remedied within the manuscript itself. I have a few recommendations below that hopefully will push this work forward:

- (1) I recommend replicating the findings while, within the same experiment, randomly assigning participants to experimental and control groups.
- (2) Within the experimental groups, I highly recommend using a group that has a LW leader as well. As such, the design will be a 3x2 (3 target ideology: right-wing, left-wing, control; 2 participant ideology: left-wing or right wing). Or, alternatively, and as guided by much research on ideology in social psychology, I highly recommend that you treat ideology as a continuous variable. The authors provide reasoning as to why a matched LW target is not accessible, but any proxy may be possible-- they don't need to be exactly matched.

(3) I recommend that the authors provide power calculations to determine their sample sizes moving forward. A highly powered study could accommodate for some minute shortcomings in the design (e.g., a fully matched LW target). It would be a great stretch to talk about ideological symmetry or asymmetry without having targets across the ideological spectrum.

(4) It would also be important to state specific hypotheses that are clear and state to the point: specify clearly what the IV, DV, and covariates are to the reader. I was consistently lost in terms of what the vast collection of variables (such as ESJ, RWA, etc.) were doing in there, considering that the authors used the single-item political ideology measure as the IV in their analyses. The predictions were unclear, which made the results hard to follow.

(5) It would be important for the authors to completely flesh out why adjustment/trustworthiness were considered to be proxies for the "cognitive rigidity" concept. Their theoretical links could benefit from guided clarity. I read too many names of concepts and mechanisms and did not see how those were manipulated or measured in the study, or how they were related to the relationship between ideology and trust. The mechanisms were technically not directly tested, but were rather hypothesized. Maybe further studies could elaborate on the mechanisms.

I anticipate this work will be pushed in the right direction with a more refined design, more data, and clear mechanisms. This is an excellent starting point, and I wish the authors the best of luck moving forward!

## Author's Response to Decision Letter for (RSOS-182023.R0)

See Appendix B.

## RSOS-182023.R1 (Revision)

### Review form: Reviewer 1

**Is the manuscript scientifically sound in its present form?**

Yes

**Are the interpretations and conclusions justified by the results?**

No

**Is the language acceptable?**

Yes

**Is it clear how to access all supporting data?**

Yes

**Do you have any ethical concerns with this paper?**

No

### Have you any concerns about statistical analyses in this paper?

No

### Recommendation?

Accept with minor revision (please list in comments)

### Comments to the Author(s)

I really appreciate the authors' thoughtful consideration of the previous comments and their efforts to revise the manuscript accordingly. I believe that the paper is improved, and I hope the authors share this view. I do think there are a few areas in the paper that could use a little more clarity, and I hope the authors will consider these points.

(1) The added reasoning about the season/condition confound in the experiment is helpful, but it does not fully reassure the reader that there is not a seasonal (perception) confound with the treatment conditions that could be potentially affecting participants' behavior. I think the clearest way to show that the season of experimental administration did not affect the experiment would be to show (relative) invariability in public perceptions of both Berlusconi and Angela over the full span of the experiment, January to December (not just Berlusconi and not just January to June). If the authors have access to such perception polls, it would do a lot to address the confound.

(2) I think the reported group binding model is not as informative as it could be. It seems that the purpose of including this analysis is to demonstrate that this group binding dimension helps to explain why RW participants might be exhibiting this trusting behavior of Berlusconi. But the included model simply shows that people who are higher in group binding psychological preferences also exhibit this trusting behavior. I think it would make more sense to include these psychological variables with (rather than instead of) the ideology variable in the model to see if the psychological variables help to explain the relationship between ideology and behavior. Furthermore, it would be even more informative – given these variables were measured – to include not only the group binding measure but also the social equality measure in the model to test whether the group binding measure does a better job of explaining the variance than preferences for equality, as the authors may be suggesting. At minimum, it seems plausible that participants' economic preferences and their perceptions of Berlusconi's economic positions could play a role in their experimental behavior.

(3) A very minor point: How correlated was participants' voting behavior in the past three elections with their explicit political orientation (p. 15)? It's stated that this question was included to verify participants' understanding of their own ideology, but how this information was used would be even more helpful.

(4) Finally, as I mentioned in my initial review, it would be helpful to include some discussion about the political implications of these results. That is, how does this simulated one-on-one trust game exchange with a famous politician (which is unlikely to happen in the real world) reflect realistic voter behavior and experience? It would be really helpful to make the potential links between the experimental context and actual political outcomes more explicit.

## Decision letter (RSOS-182023.R1)

08-Aug-2019

Dear Dr GJoneska,

On behalf of the Editors, I am pleased to inform you that your Manuscript RSOS-182023.R1 entitled "Bound to the group and blinded by the leader: ideological leader-follower dynamics in a trust economic game" has been accepted for publication in Royal Society Open Science subject to minor revision in accordance with the referee suggestions. Please find the referees' comments at the end of this email.

The reviewers and Subject Editor have recommended publication, but also suggest some minor revisions to your manuscript. Therefore, I invite you to respond to the comments and revise your manuscript.

- Ethics statement

If your study uses humans or animals please include details of the ethical approval received, including the name of the committee that granted approval. For human studies please also detail whether informed consent was obtained. For field studies on animals please include details of all permissions, licences and/or approvals granted to carry out the fieldwork.

- Data accessibility

It is a condition of publication that all supporting data are made available either as supplementary information or preferably in a suitable permanent repository. The data accessibility section should state where the article's supporting data can be accessed. This section should also include details, where possible of where to access other relevant research materials such as statistical tools, protocols, software etc can be accessed. If the data has been deposited in an external repository this section should list the database, accession number and link to the DOI for all data from the article that has been made publicly available. Data sets that have been deposited in an external repository and have a DOI should also be appropriately cited in the manuscript and included in the reference list.

If you wish to submit your supporting data or code to Dryad (<http://datadryad.org/>), or modify your current submission to dryad, please use the following link:  
<http://datadryad.org/submit?journalID=RSOS&manu=RSOS-182023.R1>

- Competing interests

Please declare any financial or non-financial competing interests, or state that you have no competing interests.

- Authors' contributions

All submissions, other than those with a single author, must include an Authors' Contributions section which individually lists the specific contribution of each author. The list of Authors should meet all of the following criteria; 1) substantial contributions to conception and design, or acquisition of data, or analysis and interpretation of data; 2) drafting the article or revising it critically for important intellectual content; and 3) final approval of the version to be published.

All contributors who do not meet all of these criteria should be included in the acknowledgements.



We suggest the following format:

AB carried out the molecular lab work, participated in data analysis, carried out sequence alignments, participated in the design of the study and drafted the manuscript; CD carried out the statistical analyses; EF collected field data; GH conceived of the study, designed the study, coordinated the study and helped draft the manuscript. All authors gave final approval for publication.

- Acknowledgements

Please acknowledge anyone who contributed to the study but did not meet the authorship criteria.

- Funding statement

Please list the source of funding for each author.

Please note that we cannot publish your manuscript without these end statements included. We have included a screenshot example of the end statements for reference. If you feel that a given heading is not relevant to your paper, please nevertheless include the heading and explicitly state that it is not relevant to your work.

Because the schedule for publication is very tight, it is a condition of publication that you submit the revised version of your manuscript before 17-Aug-2019. Please note that the revision deadline will expire at 00.00am on this date. If you do not think you will be able to meet this date please let me know immediately.

To revise your manuscript, log into <https://mc.manuscriptcentral.com/rsos> and enter your Author Centre, where you will find your manuscript title listed under "Manuscripts with Decisions". Under "Actions," click on "Create a Revision." You will be unable to make your revisions on the originally submitted version of the manuscript. Instead, revise your manuscript and upload a new version through your Author Centre.

When submitting your revised manuscript, you will be able to respond to the comments made by the referees and upload a file "Response to Referees" in "Section 6 - File Upload". You can use this to document any changes you make to the original manuscript. In order to expedite the processing of the revised manuscript, please be as specific as possible in your response to the referees.

When uploading your revised files please make sure that you have:

- 1) A text file of the manuscript (tex, txt, rtf, docx or doc), references, tables (including captions) and figure captions. Do not upload a PDF as your "Main Document".
- 2) A separate electronic file of each figure (EPS or print-quality PDF preferred (either format should be produced directly from original creation package), or original software format)
- 3) Included a 100 word media summary of your paper when requested at submission. Please ensure you have entered correct contact details (email, institution and telephone) in your user account
- 4) Included the raw data to support the claims made in your paper. You can either include your data as electronic supplementary material or upload to a repository and include the relevant doi within your manuscript
- 5) All supplementary materials accompanying an accepted article will be treated as in their final form. Note that the Royal Society will neither edit nor typeset supplementary material and it will be hosted as provided. Please ensure that the supplementary material includes the paper details where possible (authors, article title, journal name).

Supplementary files will be published alongside the paper on the journal website and posted on the online figshare repository (<https://figshare.com>). The heading and legend provided for each supplementary file during the submission process will be used to create the figshare page, so please ensure these are accurate and informative so that your files can be found in searches. Files on figshare will be made available approximately one week before the accompanying article so that the supplementary material can be attributed a unique DOI.

Once again, thank you for submitting your manuscript to Royal Society Open Science and I look forward to receiving your revision. If you have any questions at all, please do not hesitate to get in touch.

Kind regards,

Lianne Parkhouse  
Editorial Coordinator  
Royal Society Open Science  
[openscience@royalsociety.org](mailto:openscience@royalsociety.org)

on behalf of Professor Antonia Hamilton (Subject Editor)  
[openscience@royalsociety.org](mailto:openscience@royalsociety.org)

Reviewer comments to Author:

Reviewer: 1  
Comments to the Author(s)

I really appreciate the authors' thoughtful consideration of the previous comments and their efforts to revise the manuscript accordingly. I believe that the paper is improved, and I hope the authors share this view. I do think there are a few areas in the paper that could use a little more clarity, and I hope the authors will consider these points.

(1) The added reasoning about the season/condition confound in the experiment is helpful, but it does not fully reassure the reader that there is not a seasonal (perception) confound with the treatment conditions that could be potentially affecting participants' behavior. I think the clearest way to show that the season of experimental administration did not affect the experiment would be to show (relative) invariability in public perceptions of both Berlusconi and Angela over the full span of the experiment, January to December (not just Berlusconi and not just January to June). If the authors have access to such perception polls, it would do a lot to address the confound.

(2) I think the reported group binding model is not as informative as it could be. It seems that the purpose of including this analysis is to demonstrate that this group binding dimension helps to explain why RW participants might be exhibiting this trusting behavior of Berlusconi. But the included model simply shows that people who are higher in group binding psychological preferences also exhibit this trusting behavior. I think it would make more sense to include these psychological variables with (rather than instead of) the ideology variable in the model to see if the psychological variables help to explain the relationship between ideology and behavior. Furthermore, it would be even more informative – given these variables were measured – to include not only the group binding measure but also the social equality measure in the model to test whether the group binding measure does a better job of explaining the variance than preferences for equality, as the authors may be suggesting. At minimum, it seems plausible that

participants' economic preferences and their perceptions of Berlusconi's economic positions could play a role in their experimental behavior.

(3) A very minor point: How correlated was participants' voting behavior in the past three elections with their explicit political orientation (p. 15)? It's stated that this question was included to verify participants' understanding of their own ideology, but how this information was used would be even more helpful.

(4) Finally, as I mentioned in my initial review, it would be helpful to include some discussion about the political implications of these results. That is, how does this simulated one-on-one trust game exchange with a famous politician (which is unlikely to happen in the real world) reflect realistic voter behavior and experience? It would be really helpful to make the potential links between the experimental context and actual political outcomes more explicit.

## Author's Response to Decision Letter for (RSOS-182023.R1)

See Appendix C.

## Decision letter (RSOS-182023.R2)

22-Aug-2019

Dear Dr Gjoneska,

I am pleased to inform you that your manuscript entitled "Bound to the group and blinded by the leader: Ideological leader-follower dynamics in a trust economic game" is now accepted for publication in Royal Society Open Science.

You can expect to receive a proof of your article in the near future. Please contact the editorial office ([openscience\\_proofs@royalsociety.org](mailto:openscience_proofs@royalsociety.org) and [openscience@royalsociety.org](mailto:openscience@royalsociety.org)) to let us know if you are likely to be away from e-mail contact -- if you are going to be away, please nominate a co-author (if available) to manage the proofing process, and ensure they are copied into your email to the journal.

Due to rapid publication and an extremely tight schedule, if comments are not received, your paper may experience a delay in publication.

Royal Society Open Science operates under a continuous publication model (<http://bit.ly/cpFAQ>). Your article will be published straight into the next open issue and this will be the final version of the paper. As such, it can be cited immediately by other researchers. As the issue version of your paper will be the only version to be published I would advise you to check your proofs thoroughly as changes cannot be made once the paper is published.

On behalf of the Editors of Royal Society Open Science, we look forward to your continued contributions to the Journal.

Kind regards,  
Andrew Dunn  
Royal Society Open Science Editorial Office  
Royal Society Open Science  
[openscience@royalsociety.org](mailto:openscience@royalsociety.org)

on behalf of Prof Antonia Hamilton (Subject Editor)  
[openscience@royalsociety.org](mailto:openscience@royalsociety.org)

Follow Royal Society Publishing on Twitter: [@RSocPublishing](https://twitter.com/RSocPublishing)  
Follow Royal Society Publishing on Facebook:  
<https://www.facebook.com/RoyalSocietyPublishing.FanPage/>  
Read Royal Society Publishing's blog: <https://blogs.royalsociety.org/publishing/>

## Appendix A

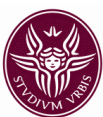

SAPIENZA  
UNIVERSITÀ DI ROMA

### RESPONSE TO REVIEWERS

#### REVIEWER No.1

“This manuscript compares the behavior of left-wing and right-wing voters in an economic trust game toward a well-known politician from the right (Berlusconi) and a well-known non-politician without a stated ideology (Angela). The authors find that left-wingers adjust their behavior toward both Angela and Berlusconi (the latter representing their political outgroup) as a function of the two figures’ purported trustworthy vs. untrustworthy behavior. In contrast, right-wingers adjust their behavior toward Angela as a function of his trustworthy vs. untrustworthy behavior, but they do not adjust their behavior toward Berlusconi (their political ingroup) as a function of his trustworthiness. Right-wingers’ consistent investment behavior toward Berlusconi is not reflected in their trustworthiness ratings of him, and it is suggested that their context-independent trust behavior toward Berlusconi can be attributed to heightened social conservatism and right-wing authoritarianism tendencies.

This is a well-written manuscript and it explores an interesting political question of when and how voters will trust and support politicians with valuable resources, which is relevant across many political contexts today. I also thought it was interesting to explore different facets of political preferences (MF, RWA, ESJ, SDO, SVO).”

*We would like to thank this reviewer for the very precise overview of our study. We are very happy to find that our story is successfully conveyed, and that the study is positively evaluated by the reviewer.*

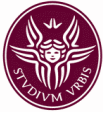

## Comment No.1

“First, I like the inclusion of a non-political figure as a control, but I was wondering why there was no left-wing politician included in the design. This seems important because the paper is framed as right-wingers “blindly” investing in their ingroup politicians whereas left-wingers do not, but the described study does not provide an opportunity to assess whether left-wingers would also “blindly” invest in their own ingroup politicians. I also think including a left-wing politician condition would increase the study’s ecological validity. In the discussion section, it seems to be suggested that there was no equivalent left-wing politician to Berlusconi in Italy, so one was not included here. However, there are certainly known left-wing politicians in Italy, and excluding such a condition should at least be explained more. At minimum, if a left-wing politician condition cannot be included, I think the language about the ideological differences should be softened substantially.”

*First, we want to thank the reviewer for pointing at a crucial aspect related to the best control stimulus for Berlusconi. We will delve into the reasons for our decision to include a famous non-politician instead of a famous left-wing politician, as soon as we clarify possible misunderstandings related to the following comment: “the paper is framed as right-wingers ‘blindly’ investing in their ingroup politicians whereas left-wingers do not, but the described study does not provide an opportunity to assess whether left-wingers would also “blindly” invest in their own ingroup politicians”. We underline the part of the quoted segment which was not included, nor implied in our paper. Namely, a conclusion about a certain behavior regarding RW-followers toward their in-group leader, is not mutually exclusive with (or in any way indicative of) the behavior of LW-followers toward their in-group leader. Therefore, the result that RW-followers “blindly” invest in an in-group leader, does not automatically imply that LW-followers behave in opposite manner, when confronted with their in-group leader in an economic trust game. As the reviewer rightly observes, we did not include a LW-leader as a control stimulus, so we were careful not to make any such claims upon shaping of the paper. This is evident in opening/closing segments of the paper i.e., the title and the discussion as follows:*



*- The original title “Right-wing electors blindly invest in their leader in the economic trust game” highlights the most prominent result related solely to the behavior of the RW-group i.e., the fact that they displayed a constant pattern of behavior towards their leader regardless of the trust/distrust version of the game. However, the title does not suggest that such behavior is juxtaposed (or in any way comparable) to the behavior of LW-group, had they been placed in a similar situation.*

*- When discussing the results, we reason that it might be “intuitive to expect that one will act irrationally when s/he is ideologically biased. In fact, RW-voters behaved in line with this reasoning: they did not adjust to trustworthy/untrustworthy behavior of their in-group leader, i.e., Berlusconi”. However, we also argue that it might be “counter-intuitive to expect that one will act rationally when s/he is ideologically biased. In our experiment, LW-voters behaved rationally in spite of this reasoning: they adjusted their economic behavior to the trustworthy/untrustworthy behavior of the out-group leader Berlusconi”. Here again, we are careful to interpret our results only in the light of the collected evidence. We did not extend the comments to a hypothetical situation of LW-group playing with an in-group leader. In fact, we go on to speculate that such behavior might be attributed to “the fact that they were not playing with an in-group leader” which, in a way, is opposite to the claim that reviewer makes in his quoted segment.*

*We added a paragraph in the discussion of the revised manuscript to highlight the point (page 9, lines 17-21).*

*Moreover, to further confirm our decision of not including a left-wing politician, in the concluding remarks of the paper we clearly affirm that “in Italy at present, we could not recognize a single LW-leader with same level of popularity as Berlusconi”. We agree with reviewer’s suggestion that “including a left-wing politician condition would increase the study’s ecological validity”, but we don’t entirely agree with his/her supporting argument that “there are certainly known left-wing politicians in Italy”. According to us, the dimensions that are deemed crucial to control in the choice of a renowned/popular LW-leader (i.e., Berlusconi’s equivalent) are the following:*

- Long-term political presence and governmental leadership experience (for example, a leader of a coalition/party or a Prime Minister of the country);*
- Persisting popularity via continuous public exposure and media appearance;*



- *Clear perception of leader's political orientation i.e., a person with unambiguous political categorization.*

*In Italy we could not find a LW-politician who embodies all required qualities. Indeed, all of the elected candidates did differ from Berlusconi in something more than ideology. For instance, the Italian Prime Minister at the time of the experiment, the much younger LW-leader Matteo Renzi, was not elected by citizens but chosen by the President of Republic instead, with mandate to form a technical administration. Also he lacked long-term political presence and media appearance. On the other hand, the career of the LW-politician Romano Prodi, is indeed marked with long-term political presence (Prime Minister in the periods of 1996-1998 and 2006-2008) which is comparable to Berlusconi's leadership experience (Prime Minister in the periods of 1994-1995, 2001-2006 and 2008-2011), but he lacks ongoing public exposure and media appearance (since his decade-long retirement from Italian politics).*

*In addition, the politicians who are currently popular are not as clearly recognized or politically categorized, as Berlusconi. This claim is supported by data from a recent experiment we conducted in 2018, for a separate study. Namely, in an independent sample of 120 RW/LW Italian voters, we tested their level of recognition and political categorization of the most prominent Italian politicians belonging to the LW-coalition, RW-coalition, or the party called "Movimento Cinque Stelle". Specifically, participants were asked to observe the faces of 30 liberals, 28 conservatives, and 9 popular politicians from the "Movimento Cinque Stelle". After the exposure, they were asked to attribute a name to each face (recognition) and rate the politicians' ideology (political categorization). This bears similarity to the automatic evaluation by our students participating in the trust economic game, since we also included a picture of the trustee (which requires prior recognition). Statistical analysis of these data confirm that the only politician who was unanimously recognized and equally categorized as conservative leader by 100% of the respondents, was indeed Berlusconi. On the other hand, the LW-politicians who were either unanimously recognized (like Matteo Renzi), or politically categorized (like Nichi Vendola) by all respondents, did not receive full recognition/categorization respectively. Also, we would like to highlight the fact that these results are*





*collected in 2018, when Renzi was already recognized as a former Prime Minister (period of 2014-2016), while Vendola became prominent LW-politician (former president of Regione Puglia, 2005-2010, and leader of the national left-wing party "Sinistra Ecologia e Libertà, 2010-2016). Since we couldn't rely entirely on the prominent LW-politicians we also analyzed the political recognition/categorization for the representatives from "Movimento Cinque Stelle". As expected, their most prominent candidates had very high recognition, but very ambiguous political categorization.*

*In summary, we believe that the political settings in Italy at the time of data collection did not allow us to find any LW-match to Berlusconi. However, we strongly support the idea of replicating the study in a different geopolitical context and recommend "that future studies from countries where a left-wing equivalent (with matching years of political presence, leadership experience, and media appearance) exists, can help to address the question about the power of the leader on both LW- and RW-voters".*

*Upon reviewer's suggestion, in the discussion of the manuscript we included a summary of this response, containing the explanations about the most prominent Italian LW-politicians, and our decision to sustain from employing them as stimuli in our experiment (page 9, lines 22-40).*



## Comment No. 2

“Is it possible that Angela is perceived as a relatively left-wing figure, even if he is not a politician? On this point, it could be helpful to include ideological ratings of the two figures in addition to the other ratings in the SI ‘Evaluation of trustees’ table.”

*We thank the reviewer for posing such insightful question which provides us with opportunity to offer more in-depth account of our study.*

*In the preparatory phase of the experiment, we conducted an online survey on an independent sample of 42 students, assessing two acclaimed national television hosts, Piero Angela (86yr) and Gerry Scotti (59yr). Both stimuli were selected for their high popularity and relatively close age to Berlusconi. Neither of the stimuli was an acclaimed politician or has been publicly associated with the Italian politics. In order to choose a control stimulus who would be a better fit in terms of political neutrality participants were asked to decide if each of the TV-hosts is taking a political side (i.e., to quantify the political orientation of the stimulus) and if so, which side they are taking (i.e., to qualify the political orientation of the stimulus). The former question was rated on a 5-point Likert-scale (grading from 1= “not at all” to 5 = “very much”), while the later was rated on a 7-point Likert-scale (1=“extremely left”; 2=“left”; 3=“center-left”; 4=“center-right”; 5=“right”; 6=“extremely right”, 7=“apolitical”). In our analysis, we performed a unique index of the two measures by scaling participants’ scores on each question, and calculating the overall political polarization of the stimulus as the distance from the center (where 0.0 = “center” signifies the absence of political polarization, while 3.5 signifies highest political polarization). Two separate *t*-tests for each stimulus’ ratings on political polarization were performed against zero, and both proved to be significant (Scotti:  $t(39) = 7.14, p < .001$ ; Angela:  $t(38) = 6.41, p < .001$ ), meaning that no stimulus could be perceived as absolutely neutral. However, the *t*-test for paired samples showed a significant difference on the ratings attributed to Scotti’s and Angela’s political polarization ( $t(39) = 2.64, p < .05$ ), with Scotti receiving an average score of 0.51, while Piero Angela a score of 0.31. Considering that the complete absence of political polarization was rated as 0.0, while the*



*maximal polarization was 3.5, both characters were minimally polarized. We opted for Angela as a significantly better-fitted control, both in terms of closer age and lower political polarization.*

*In order to directly address the reviewer’s comment, we also analyzed the ideological scores attributed to the chosen control stimulus (Piero Angela), by the sample participating in the experiment (RW- and LW-group of students). Here, again we employed a 7-point Likert scale in order to qualify Angela’s political orientation (1=“extremely left”; 2=“left”; 3=“center-left”; 4=“center-right”; 5=“right”; 6=“extremely right”, 7=“apolitical”). The responses marked as “7” were substituted with “0” (signifying no political orientation whatsoever), while the rest were scaled in the range from -2.5 (“extremely left”) to 2.5 (“extremely right”). The results show that the sample of participating students, again rated Angela similarly, with an average score of -0.31, suggesting that indeed he was considered as a figure with low political polarization. In addition, there were no statistical differences between the groups (RW/LW) on the political categorization of Angela ( $F(119) = 3.32$ ;  $p = .071$ ). Hence, both had similar perceptions of Angela and neither LW-voters nor RW-voters perceived him as more politically inclined toward the liberal/conservative ideologies. As insightfully suggested by the reviewer, we included the results regarding the assessment of the control stimulus in a separate table (added in the SI “Evaluation of Trustees”). As evident from the Tab.1, the obtained result may be indicative of the notion that no group perceived him as a potential in-group/out-group member/leader.*

| Political Orientation: Evaluation of Piero Angela |                  |    |       |      |         |         |
|---------------------------------------------------|------------------|----|-------|------|---------|---------|
| Group                                             | F(1, 119) = 3.32 | N° | Mean  | SD   | +95% CI | -95% CI |
|                                                   | p-value          |    |       |      |         |         |
| LW                                                | .071             | 63 | -0.44 | 0.80 | -0.64   | -0.23   |
| RW                                                |                  | 58 | -0.17 | 0.79 | -0.38   | 0.04    |

*Tab. 1 One-way ANOVA on 121 participants with the Group (RW/LW) as between-subjects factor, and the ratings regarding Piero’s Angela Political Orientation as dependent variable.*



*This result is also mirrored in the economic behavior of participants at the beginning of the Trust game and throughout its entire course. Namely, initial investments in both groups did not differ significantly for the amounts of money they sent towards Angela or Berlusconi. Indeed, the 2 x 2 ANOVA with the Group (LW/RW) and Trustee (SB/PA) as between-subjects factors, and the initial investment (1-10 euro) as a dependent variable, shows no statistical difference between the groups for each of the Trustee ( $F(1, 114) = .95, p = .331$ ). Hence, the result can be interpreted as a lack of preexisting in-group/out-group bias toward either Angela or Berlusconi. Furthermore, both groups adjusted their economic behavior throughout the game to the trust/distrust condition when they played with Angela, as evident in Fig. 3 of the manuscript showing the linear mixed-effects analysis for each Group (LW/RW) playing with each Trustee (SB/PA), with Trial No (1-15) and TG Condition (trust/distrust) as fixed effects, and participants as random effects of varying intercepts. Namely, the LME-model shows that there is a difference in the economic behavior between the two TG Conditions when each group is playing with Angela (by increasing or decreasing offers throughout the game to correspond to the behavior of Angela i.e., adjusting to his behavior within the course of the game). In contrast, the LW-group managed to adjust their behavior according to the trustworthy/untrustworthy version of Berlusconi, while the RW-group did not.*



### Comment No. 3

“As a side point, I was also wondering if participants found the trustworthy and untrustworthy interactions with Berlusconi (and to a lesser extent, Angela) believable. I don’t think this is critical to the manuscript, but is there any way to assess whether the trustworthy vs. untrustworthy conditions reflect subjects’ preexisting perceptions of Berlusconi?”

*We are grateful for this comment as it enables us to highlight those segments of the manuscript that are specifically related to the mentioned concerns, and to present them in a more detailed and concise manner.*

*Firstly, we would like to underline that participants’ distrust in the cover story was the main exclusion criteria in the analysis of their economic behavior. Therefore, we exempted three subjects who did not believe in the cover story, and included a selection of 118 subject in the final analysis of the economic behavior (as already reported on page 3 of the manuscript, under the section “Materials and Methods: Participants”). Participants’ trust in the cover story was assessed with a carefully designed manipulation-check protocol in order to extract their response without disclosing/suggesting the aim of the study in advance. Therefore it started with the following indirect questions: “According to you what is the scope of the experiment?” (to which participants provided written explanations) and “Was the mathematical model predictive of Trustee’s behavior?” (to which they responded by using a 0-100 VAS scale). The participants who indicated predictability of the mathematical model lower than 30% (the cutoff value), were again asked to provide written justification for their reasoning. At the end, participants whose summary answers on all three questions implied that they guessed the real aim of the experiment, were directly asked whether they believe in the cover story. A negative response was taken as the main reason for exclusion of the participant from the analysis of the economic behavior. The participants who were included (i.e., believed in the story about “the mathematical model”), were surveyed regarding the reliability of “their partner” in the game (i.e., they provided post-experimental evaluation of how un/trustworthy was the Trustee during the game, on a 0-100 VAS scale).*



*The post-experimental ratings of Trustee's economic behavior were analyzed and confirmed that participants were explicitly aware whether he behaved in trustworthy/untrustworthy manner, regardless of who the partner was (SB or PA), and to which group he/she belonged (LW or RW). Namely, these ratings on Trustee's Perceived Trustworthiness (0-100 VAS) were analyzed in a 2 x 2 x 2 ANOVA, with the Group (LW/RW), TG Condition (trust/distrust) and Trustee (SB/PA) as between-subjects factors. This analysis did not result in a significant triple interaction ( $F(1,109) = .88, p = .351$ ), showing that the two groups did not differ significantly in the explicit trustworthiness ratings of their respective partners, and for the respective TG conditions. Instead, we did find a significant main effect of the TG condition  $F(1, 109) = 47.13, p < .001$ , showing that both groups attributed higher/lower trustworthiness ratings to the respective version of the game. This suggests that, at least at the explicit level, participants' evaluation of their partners' behavior is not based on preexisting perception about his trustworthiness.*

*Finally, to directly address the reviewer's concern, we ran a simple linear regression analysis where the scores which participants attributed to Berlusconi's trustworthiness prior to the experiment (on a 5-point Likert scale) were used as a predictor variable, while their post-experimental ratings of Berlusconi's trustworthy/untrustworthy behavior throughout the game (on a 0-100 VAS scale) were employed as a dependent variable. The results were not statistically significant ( $F(1, 58) = .62, p = .433$ ), meaning that there was no linear relationship between the two variables. Hence, the first measure which was taken as an indicator of a preexisting bias regarding Berlusconi's trustworthiness did not affect the perception of Berlusconi's trustworthy/untrustworthy behavior during the game i.e., the explicit evaluation was unbiased and realistic.*



#### Comment No.4

“Could the measures used for the Explicit Political Orientation questionnaire be provided in the text? Considering this is the IV used in the primary analyses, I was hoping to understand how ideology was measured – for example, was it a single self-placement item, a composite measure of different ideological dimensions, or a composite measure of positions on a variety of policies?”

*We appreciate this thoughtful comment, which invites us to provide detailed explanations, and creates space for additional procedural descriptions. In line with reviewer’s presumptions, participants’ political orientation was measured via direct question i.e., by asking participants to self-place on a 7-point Likert-type item (1=“extremely left”; 2=“left”; 3=“center-left”; 4=“center-right”; 5=“right”; 6=“extremely right”, 7=“apolitical”). According to the responses, participants were then split in two groups, with the LW-group consisting of voters who assigned scores from 1 to 3 on the self-placement scale, while the RW-group of voters who self-assigned scores ranging from 4 to 6. Those who rated themselves as apolitical (i.e., selected “7”) were excluded from the experiment. We also introduced several control questions asking participants to specify the voted party at the three last consecutive elections (in order to make sure that selected participants had clear idea regarding their own political orientation), and to specify to whom and how often they talk about politics (in order to have extra measure about participants’ interest in politics).*

*In order to make this point more clear, we inserted a new paragraph under the “Material and Methods: Procedure” section of the manuscript which now reads as follows: “Participants’ self-reported ideology” (page 3, lines 49-58).*



## Comment No.5

“I think the model using the social conservatism factor is interesting and illuminates potential mechanisms by which the observed ideological differences may emerge. Would it be possible to include a similar model using the economic liberalism factor, perhaps in the SI? It seems a lost opportunity to measure these constructs, which likely also play a role in the economic behavior in this context, but not to explore them.”

*We share reviewer’s appreciation for the additional ideological indicators (which can be extracted from measures like MF, RWA, ESJ, SDO, SVO).*

*As regards reviewer’s specific suggestion to address the Economic Liberalism in addition to the Social Conservatism factor, as mentioned on page 5 of the manuscript, the principal component analysis did reveal a two-factor structure. The Economic Liberalism mainly loaded by MFQ Fairness, MFQ Harm and SDO, while the Social Conservatism by MFQ Purity, MFQ Authority, MFQ Loyalty and RWA. The dimensions emerged with the varimax orthogonal rotation i.e., they were considered as independent to each other and therefore they could have different and autonomous contributions in explaining of participants’ behavior during the TG. As asked by this reviewer, we repeated the same analysis on both factors.*

*Specifically, by following the same procedure adopted for Social Conservatism factor analysis, we applied several models of increasing complexity including the Economic Liberalism. The full LME model had the following fixed effects: Trial No (1-15), TG Condition (trust/distrust), Trustee (SB/PA) and Economic Liberalism Scores (with interaction term), while the participants were always treated as random effects with varying intercepts. The results revealed that, differently from Social Conservatism, the full-interaction model was not marked by AIC drop, or by significant change in the LR (as compared to its nested model).*





*In light of these results and in line with our preliminary hypothesis, we think that only Social Conservatism provided meaningful explanations about participant's economic behavior over the entire course of the economic exchange. Upon reviewer's request, a supplemental figure is added to this response, representing a heat map model (Fig. 1) of participants' economic behavior in function of their Economic Liberalism scores. As shown on the map, the Economic liberalism did not add meaningful insights on participants' economic behavior throughout the game.*

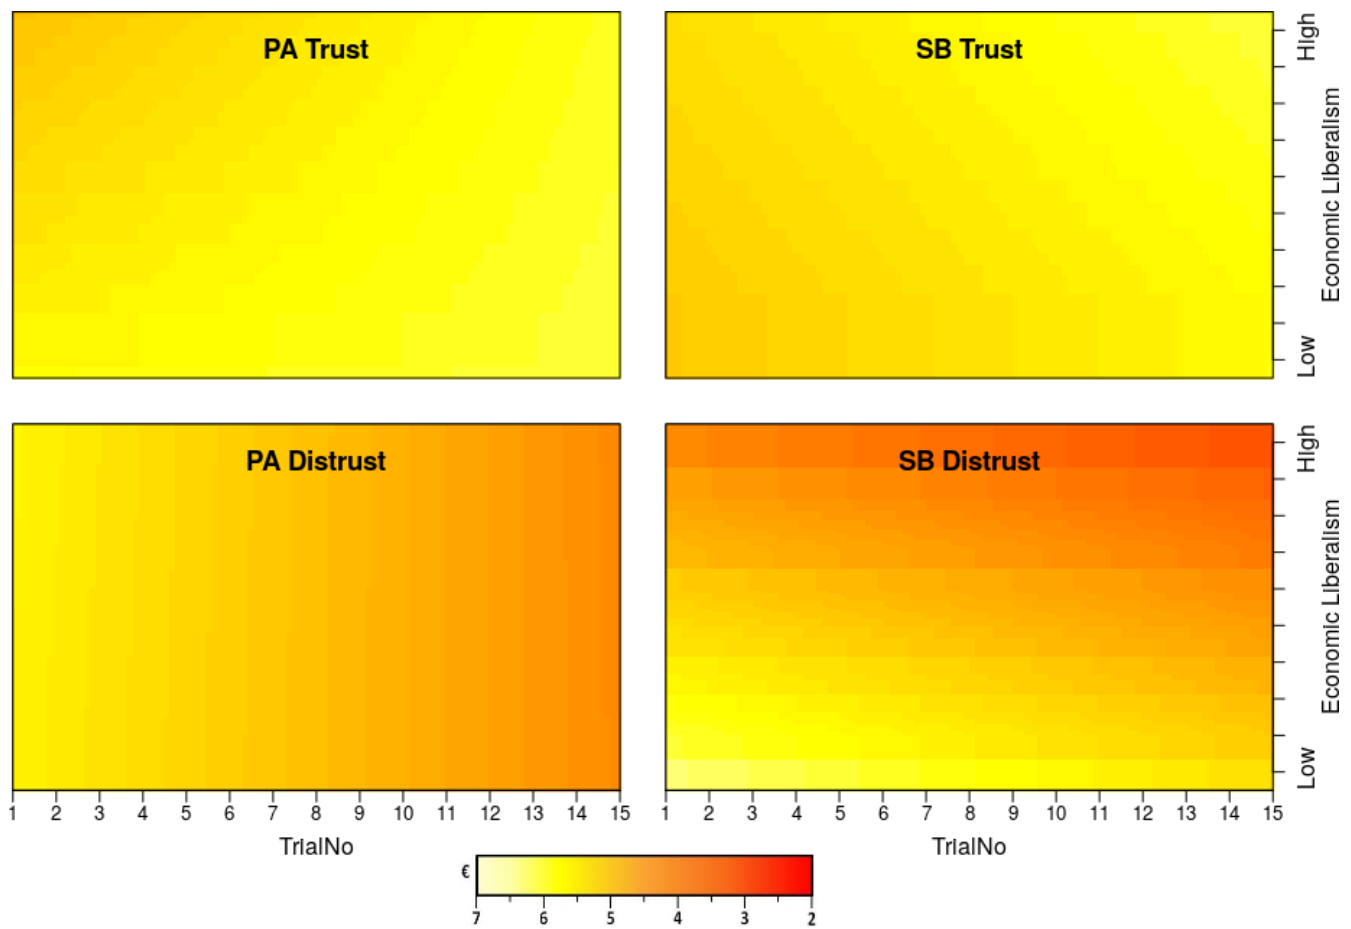

*Fig. 1 Heat map model of the economic behavior of participants as a function of their level of Economic Liberalism. The panels on the left indicate participants' economic behavior during the Trust Game with Piero Angela (PA), while those on the right indicate participants' economic behavior throughout the Trust Game with Silvio Berlusconi (SB). The upper panels indicate the change of participants' behavior in response to a trustworthy game partner, while the lower panels display the participants' adjustment to an untrustworthy game partner. The color-grading provides coarse-grained orientation on the probability to invest a certain amount: red indicates low, while yellow color high probability to invest. The legend provides fine-grained insight into the numerical gradient of change in investment.*



## Comment No. 6

“Finally, it would be helpful to include some discussion about the political implications of these results. It’s not totally clear to me how one-to-one interactions and exchanges with political leaders are realistic, but perhaps the authors could consider other economic scenarios/games in which the investments are explicitly framed as donations and trustees’ behavior is linked to some policy outcomes, for example.”

*In the reply to Comment No. 3 by this reviewer, we provided additional explanations and empirical evidence supporting the idea that our participants genuinely believed in our cover story throughout the course of one-to-one TG interactions, so we hope that the reviewer is now convinced in this point. We find his/her concluding remarks (about the wider political implications from our results) to be in line with our reasoning which was also stated in the manuscript. Those considerations were the driving force behind our decisions to specifically choose the trust economic game over the other economic scenarios/games.*

*Below we will provide the rationale for such choice and indicate the paragraph of the paper where we discuss it:*

- *In the introductory part (page 2) of the paper we motivate the choice of using a TG scenario: “Leaders use extended media presence in order to exert influence over potential voters, by means of projecting admirable personality traits, portraying them as desirable candidates. Hence their roles (e.g., leaders as trustworthy and voters as trusting subjects) and the incentives (e.g., economic offers) may be reflected in the experimental design of the Trust Game (TG).”*
- *We also considered the fact that TG realistically reflects the relationship between the followers and the political leaders, since each voter is also a tax-payer (i.e., trustor) while the political leaders with governmental experience are decision-makers (i.e., trustees) who can choose to spend the budget for societal improvements (thus returning the trust and behaving trustworthy), or for their own benefits (thus behaving in an untrustworthy manner).*



SAPIENZA  
UNIVERSITÀ DI ROMA

*- Moreover, we decided to select a TG design because our study pioneered in using a cover story about a supposed mathematical model (claiming “a realistic representation” of a political leader) which allowed for one-on-one interaction between the leader and the voter. A donation paradigm would not return in a reciprocation towards the electors from the political leader (or the famous character). Finally, a different paradigm would not allow us to test the plasticity of trusting an in-group/out-group political leader (with respect to a famous non political polarized character) which was another important aim of the present study. Hence, we decided to go with a well-established experimental design resulting in findings that would be clear for analysis, interpretation, and comparison with similar studies.*



## REVIEWER No.2

### Comment No. 1

*“I am not entirely sure what to make of this manuscript. It is interesting, but to me it seems more like a promising pilot study than a definitive study. I am not entirely sure what it means, psychologically (to research participants) to play a trust game with Berlusconi’s ‘algorithm’ but it does raise some intriguing questions.”*

*Firstly, we would like to thank this reviewer for the efforts dedicated in the revision of our manuscript. We found his/her comments very useful, since they opened a floor for fruitful discussion, inviting interesting considerations and additional elaborations along the way.*

*As to the comment that the presented research may seem like a promising “pilot study”, we believe that given its pioneering nature, our study might pave a way towards replications on large populations (testing, for example the postulated hypotheses in various geopolitical contexts and with different political leaders). Also, supported by multiple analyses, we strongly believe this initial study provides important clues on the processes underlying the trust of in-group/out-group voters toward their political leaders.*

*We agree with reviewer’s comment that an interaction with a living person rather than an “algorithm” may be preferable, and we are aware that participants’ perception of a model of a person, might not equal with their perception of that very person. At the same time, we expect that the reviewer will agree with us upon the fact, that in the real life, a real inclusion of a famous leader in a role of a trustee, is hardly achievable.*

*Therefore, we introduced a cover story which was considered plausible according to participants’ ratings during the manipulation-check protocol. The cover story informed the participants about “a mathematical model” which calculates trustee’s responses to trustor’s monetary offers, based on a psychological/ideological assessment of the real trustor (from their responses to the questionnaires),*



*and on the basis of match/mismatch with the trustee's profile. Here we want to highlight the fact that the cover story enabled an ecological reference, produced credence and have been massively used in the psychological research (Dickson, 2011)<sup>1</sup>.*

*Because we relied on the cover story in order to induce a sense that the economic interactions are realistic in their nature, we took participants' distrust in the cover story as the main criteria for their exclusion upon the analysis of the economic behavior. Therefore, we exempted three subjects who did not believe in the cover story, and performed the final analysis on a selection of 118 subjects. As mentioned in the response to the first reviewer, participants' trust in the cover story was assessed via carefully designed manipulation-check protocol, to extract their response without disclosing/suggesting the aim of the study in advance. Namely, it started with the following indirect questions: "According to you what is the scope of the experiment?" (to which participants provided written explanations) and "Was the mathematical model predictive of Trustee's behavior?" (to which they responded by using a 0-100 VAS scale). The participants who indicated predictability of the mathematical model lower than 30% (the cutoff value), were again asked to provide written justification for their reasoning. At the end, participants whose summary answers on all three questions implied that they guessed the real aim of the experiment, were directly asked whether they believe in the cover story. A negative response was taken as the main reason for exclusion of the participant from the analysis of the economic behavior. The participants who were included (i.e., believed in the story about "the mathematical model"), were surveyed regarding the reliability of "their partner" in the game (i.e., they provided post-experimental evaluation of how un/trustworthy was the Trustee during the game, on a 0-100 VAS scale).*

*On a final note, while an "algorithm" certainly can't substitute a real person, the tangibility of our results regarding the adaptive behavior of LW-voters according to all our scenarios (trustworthy and untrustworthy versions of Angela/Berlusconi) and of the RW-voters according to a part of all our scenarios (trustworthy and untrustworthy versions of Angela) suggests that participants were indeed genuinely involved in the economic game.*



## Comment No. 2

“I am not convinced that such a strange situation really says much about “voter-leader interactions” (p. 7).”

*A similar concern was also raised in the last comment of the first reviewer, who expressed uncertainty as to “how one-to-one interactions and exchanges with political leaders are realistic”. So, we will refer to our previous response in order to address this issue:*

*- In the introductory part (page 2) of the paper we explain our motif behind the choice of the Trust Game: “Leaders use extended media presence in order to exert influence over potential voters, by means of projecting admirable personality traits, portraying them as desirable candidates. Hence their roles (e.g., leaders as trustworthy and voters as trusting subjects) and the incentives (e.g., economic offers) may be reflected in the experimental design of the Trust Game (TG).”*

*- We also considered the fact that TG captures the core of the relationship between the followers and the political leaders, since each voter is also a tax-payer (i.e., trustor) while the political leaders with governmental experience are decision-makers (i.e., trustees) who can choose to spend the budget for societal improvements (thus returning the trust and behaving trustworthy), or for their own benefits (thus behaving in an untrustworthy manner).*

*Hence, a computerized Trust Game seemed to us a well-validated experimental paradigm for capturing complex voter-leader relationships, and a plausible approach to investigate behavioral correlates of leader-voter trustworthiness.*



### Comment No. 3

“My main concern, however, is that the sample is too small to support meaningful conclusions, and it is potentially problematic that there was no left-wing equivalent to Berlusconi included in the design of the experiment.

The final sample was  $N = 118$  (p. 4), and (before exclusions) there were 58 rightists and 63 leftists altogether. There were two between-participants experimental conditions, which means that there were roughly 24-32 (or less, after exclusions) participants in each condition. I am afraid that these numbers are just too small to warrant the drawing of conclusions about rightists and leftists in Italy. I have not performed any power analyses, but I suspect that the study is dramatically under-powered.”

*Firstly, we thank the reviewer for the raised issues regarding the sample size, and the generalizability of our results, since they provide an opportunity to elaborate on the additional analyses in support of our findings. Before proceeding with the supporting evidence, we would like to clarify that the final sample constituted of 118 participants, since only 3 participants were excluded from the analysis on economic behavior due to their distrust in the cover story.*

*We did use a frequentist approach to investigate our hypothesis, but at the same time we were very careful to employ different types of statistical approaches (starting with ANOVA's where we considered the means of each group and condition, ending with mixed models analysis where we considered all the data points we collected in the experiment). As suggested by the reviewer, the p-value depends on the number of participants, so we decided to back-up our findings with a Bayesian inferential approach as a way of solving possible problems with the power-analysis.*

*To this purpose, we performed the Bayesian regression models with Stan package (Bürkner, 2018). For our analysis, we set weakly informative priors on the estimated parameters as explained in the text. Then, posterior credible intervals (95% PCI) to quantify our beliefs on each parameter. The degree of relative evidence in favor of the Alternative Hypothesis ( $H_1: \beta \neq 0$ ) compared to the Null Hypothesis ( $H_0: \beta = 0$ ) was computed through the Dickey-Savage density ratio, by comparing the*



*probability density of  $H_0$  under the prior distribution vs. the posterior distribution ( $B F_{10}$ ). For the sake of simplicity, when the data support the null, we report the probability density of  $H_0$  under the posterior distribution vs. the prior distribution ( $B F_{01}$ ), which measures the relative evidence in favor of the null (vs. the alternative). To describe the amount of evidence, we use the labels proposed by Raftery (1995), as reported in Jarosz and Wiley (2014).*

*In the following section we refer to the main findings of a key-performed analysis:*

*To explore the overall dynamics of trust we employed linear mixed effects modeling (LME) in brms. This approach allowed us to thoroughly investigate the relationship between the economic behavior indexed by the amount of investment offered by participants at each trial and their self-reported political orientation (LW/RW). Therefore, we specified several models of increasing complexity with the simplest as a random-intercept model, allowing only between-subject variance in the average investment. The full model had the following fixed effects: Trial No (1-15), Group (LW/RW), TG Condition (trust/distrust) and Trustee (SB/PA), along with all the possible interactions across the variables. Participants were always treated as random effects with varying intercepts. The model selection relied on the Watanabe-Akaike Information Criterion (WAIC). The results revealed that the full-interaction model was marked by both WAIC drop from 8118.62 (model with the main effect of Trial No, TG Condition and their interaction) to 8115.63 (full model) ( $\Delta WAIC = -2.99$ ). Thus, the full-interaction model was selected as a best fit, showing that the economic behavior of the trustor changed as a function of the interaction between trustee's and own political orientation, and their mutual economic exchange. The changes in trustor's behavior unfolded throughout 15 exchanges, hinting at a considerable short-term plasticity of trust. Crucially, we found positive evidence in favor of the four-way interaction ( $B F_{10} = 17.06$ ).*





#### Comment No.4

“Furthermore, the failure to include a left-wing equivalent to Berlusconi (like Romano Prodi) means that we cannot really tell whether there was an ideological asymmetry in terms of trust behavior. It is possible that leftist participants would persist in trusting Prodi, but it is also possible that they would not. Until this question is answered, it is not clear to me what we can conclude from this study.”

*We share the reviewer’s interest in considering the possibilities for ideological asymmetry. However, we suggest that it might be a promising direction for exploration in countries with strong LW-leaders. As for our study, we want to highlight the fact that we referred about the behavior of the RW-group towards an in-group leader, without the aim to draw any conclusions regarding the behavior of the LW-group towards a hypothetical in-group leader. In fact, we agree with the reviewer that, at this point, it remains unclear whether an ideological asymmetry will emerge, or the results will be mirrored in both groups.*

*We added a paragraph in the discussion of the revised manuscript to highlight the point (page 9, lines 17-21).*

*In addition, we will point to segments of our previous response (to the first reviewer) where we explain our caution in drawing parallels upon shaping of the paper:*

*- The original title “Right-wing electors blindly invest in their leader in the economic trust game” highlights the most prominent result related solely to the behavior of the RW-group i.e., the fact that they displayed constant pattern of behavior towards their leader regardless of the trust/distrust version of the game. However, the title does not suggest that such behavior is juxtaposed (or in any way comparable) to the behavior of LW-group, had they been placed in a similar situation.*

*- In the discussion we reason that it might be “intuitive to expect that one will act irrationally when s/he is ideologically biased. In fact, RW-voters behaved in line with this reasoning: they did not adjust to trustworthy/untrustworthy behavior of their in-group leader, i.e., Berlusconi”. However, we also argue that it might be “counter-intuitive to expect that one will act rationally when s/he is ideologically biased. In our experiment, LW-voters behaved rationally in spite of this reasoning: they adjusted their economic behavior to the trustworthy/untrustworthy behavior of the out-group leader Berlusconi”. Here again, we are careful to interpret our findings according to the collected*



*evidence. We did not extend the comments to a hypothetical situation of LW-group playing with an in-group leader. In fact, we go on to speculate that such behavior might be attributed to “the fact that they were not playing with an in-group leader” which, in a way, is opposite to the claim about ideological asymmetry.*

*Finally, we motivated our decision to refrain from including a left-wing politician (with special explanation about the suggested Romano Prodi). In the concluding remarks of the paper, we clearly affirm that “in Italy at present, we could not recognize a single LW-leader with same level of popularity as Berlusconi”. According to us, the crucial dimensions for control in the choice of a renowned/popular LW-leader (i.e., Berlusconi’s equivalent) are the following:*

- Long-term political presence and governmental leadership experience (for example, a leader of a coalition/party, or a prime minister of the country);*
- Persisting popularity via continuous public exposure and media appearance;*
- Clear perception of leader’s political orientation i.e., a person with unambiguous political categorization.*

*As we already report in our previous response (to the first reviewer), in Italy we could not find a LW-politician who embodies all required qualities. Indeed, all the selected candidates differ from Berlusconi in something more than ideology. For instance, the Italian Prime Minister at the time of the experiment, the much younger LW-leader Matteo Renzi, was not elected by citizens but chosen by the President of Republic with mandate to form a technical administration. Also he lacked long-term political presence and media appearance. On the other hand, the career of the LW-politician Romano Prodi, is indeed marked with long-term political presence (Prime Minister in the periods of 1996-1998 and 2006-2008) which is comparable to Berlusconi’s leadership experience (Prime Minister in the periods of 1994-1995, 2001-2006 and 2008-2011), but he lacks ongoing public exposure and media appearance (since his decade-long retirement from politics).*

*We added a paragraph in the discussion of the revised manuscript to highlight the point (page 9, lines 22-40).*



*In addition, the politicians who are currently popular are not as clearly recognized or politically categorized, as Berlusconi. This claim is supported by data from a recent experiment (conducted in 2018, for a separate study). Namely, in an independent sample of 120 RW/LW Italian voters, we tested their level of recognition and political categorization of the most prominent Italian politicians belonging to the LW-coalition, RW-coalition, or the party called “Movimento Cinque Stelle”. Specifically, participants were asked to observe the faces of 30 liberals, 28 conservatives, and 9 popular politicians from the “Movimento Cinque Stelle”. After the exposure, they were asked to attribute a name to each face (recognition) and rate the politicians’ ideology (political categorization). This is similar to the evaluation performed automatically by the students participating in the trust economic game, since we also included a picture of the trustee (which requires prior recognition) and statistical analysis of these data confirm that the only politician who was unanimously recognized and equally categorized as conservative leader by 100% of the respondents, was indeed Berlusconi. On the other hand, the LW-politicians who were either unanimously recognized (like Matteo Renzi), or politically categorized (like Nichi Vendola) by all respondents, did not receive full recognition/categorization respectively. Also, we would like to highlight the fact that these results are collected in 2018, when Renzi was already recognized as a former Prime Minister (period of 2014-2016), while Vendola became prominent LW-politician (former president of Regione Puglia, 2005-2010, and leader of the national left-wing party “Sinistra Ecologia e Libertà, 2010-2016). Since we couldn’t rely entirely on the prominent LW-politicians we also analyzed the political recognition/categorization for the representatives from “Movimento Cinque Stelle”. As expected, their most prominent candidates had very high recognition, but very ambiguous political categorization.*

*In summary, we believe that the political settings in Italy at the time of data collection did not allow us to find any LW-match to Berlusconi. However, we strongly support the idea of replicating the study in a different geopolitical context and recommend “that future studies from countries where a left-wing equivalent (with matching years of political presence, leadership experience, and media appearance) exists, can help to address the question about the power of the leader on both LW- and RW-voters”.*



## Comment No. 5

“There are other concerns I have as well. If I am reading things correctly, the Berlusconi condition was run many months before the control condition (Angela). This means that there is a confound between time (or season) and interaction partner.”

*As rightly noted by the reviewer, the study was conducted in two separate experiments for two consecutive periods during 2014 (Exp 1: January-July and Exp 2: October-December). The main experiment (Exp 1) utilized Silvio Berlusconi, former Prime Minister of Italy and leader of the center-right parties' coalition, while the control experiment (Exp 2) utilized Piero Angela, a famous TV host. However, we believe that there is no confound between time (season) and the interaction partner based on the following reasons:*

*- We decided to choose Berlusconi as our main stimulus for the first experiment and to conduct Exp1 in a single batch, specifically for the purpose of avoiding the confound of time on the public perception of Berlusconi. Namely, we wanted to avoid the possibility that unexpected political developments might affect the public image of Berlusconi. Indeed, a political trust-index may quickly fluctuate due to the constant political engagements and public affairs. That's why his trust-index was closely monitored with bimonthly reports, obtained by “Istituto Piepoli” (an agency specialized in marketing and opinion research) revealing 31%, 31%, and 34% of the total voting-pool, for the months of January, April, and June (i.e., remaining fairly stable throughout the testing period).*

*- On the other hand, we did not expect considerable fluctuation in the public perception of Angela, and we were not restrained by the period/season for the Exp2. He is a famous non-politician with long-term media presence, but stable public appearance. This was confirmed in both, the pilot study and the experimental study, where participants on both sides did not differ in their perception of Angela and considered him as a relatively neutral character.*



SAPIENZA  
UNIVERSITÀ DI ROMA

*At the end we want to remind that we utilized between-subjects design, employing separate participants for each Group (LW/RW), Trustee (SB/PA) and Condition (trust/distrust). Hence, no subject was involved twice in a same procedure (to play with separate Trustees or different Conditions) and the possibility for the confound between period, interaction partner and condition was avoided altogether. Moreover, we are not familiar with possible confounding effects represented by seasons over the political interaction partner.*



## Comment No. 6

“I also have some questions about the results (and how to interpret them). Why were there no differences between leftists and rightists in terms of (a) how much they invested in Berlusconi vs. Angela (p. 5), and (b) explicit trustworthiness ratings of Berlusconi vs. Angela (p. 6)? I find these null results to be surprising, and they make interpretation of the behavioral results more difficult, in my judgment.”

*This is a thoughtful remark, and we are grateful for the possibility to offer our interpretation about the pointed findings.*

*We agree with the reviewer that the lack of significant double interaction between the Group (LW/RW) and the Trustee (SB/PA) in the first investments may appear counter-intuitive. Two non-mutually exclusive explanations can be offered for the initial lack of bias. The first is that although the participants believed in the cover story about the “mathematical model”, they started out by testing the game and become gradually more involved in the interaction with their partner as the game progressed. The second possible explanation of the model is that at the time of the experiment Berlusconi was no longer in a position of highest power and his ancient charisma might have been reinforced as the interaction developed.*

*The lack of the significant triple interaction between the Group (LW/RW), TG Condition (trust/distrust) and Trustee (SB/PA) on the perceived trustworthiness ratings, showed that both groups attributed higher/lower trustworthiness ratings to the respective version of the game. So, it suggests that the participants were really involved in the interaction with their partners on the overall, since they were consequently able to make explicit distinction between Trustee’s trustworthy and untrustworthy behavior. We find this result to be in line with the existing literature on group processes (Avenanti et al., 2010) and studies on differences between implicit and explicit measures in partisans (Galdi, Arcuri & Gawronski, 2008; Nevid & McClelland, 2010). Also we believe that it provides additional insight about the ideological bias regarding the trust in a political leader, so we decided to include it in our report.*



**Comment No. 7**

“In terms of theoretical issues, I don’t think that this paradigm can tell us anything about whether liberals and conservatives differ in terms of cognitive rigidity (p. 7).

*We thank the reviewer for his comment, because it opens space for elaboration on the wealth of evidence supporting our discussion points.*

*Regarding the issue of cognitive rigidity, in a study by Amodio et al (2007), the authors provide neurophysiological support for the claim that “stronger conservatism (versus liberalism) is associated with less neurocognitive sensitivity to response to conflicts”. This is in line with other behavioral studies by Jost et al (2003), and Kruglanski et al (2006), where conservatives exhibit overall tendency for habituation to fixed or repetitive responses, with lack of sensitivity for conflicting responses.*

*We believe that in our study, such dispositional inclination in the RW-group would have produced a lack of adjustment to both experiments, regardless of the interaction partner. At a minimum, we could have expected lack of adjustment to Angela’s untrustworthy behavior. However, the fact that the RW-group demonstrated lack of adjustment to (un)trustworthy behavior of their in-group leader (but not the control character), implies that when it comes to the ideological context more powerful forces might be at play. We now hope that the parallelism is made clearer.*

*In order to stress the point more explicitly, we expanded the paragraph accordingly (please refer to page 7, lines 55-59 and page, 8 lines 6-11).*



## Comment No. 8

“I also don’t know what it has to do with moral foundations theory, except to the extent that the behavior is tapping into authoritarianism. I am unsure about the connection to gaze-attraction as well.”

*With regards to the ideology, we like to elaborate on the relationship between moral values and the authoritarian attitudes. So far, Kugler et al (2012), have provided direct evidence that “liberal-conservative differences in moral intuitions are statistically mediated by authoritarianism and social dominance orientation, so that conservatives’ greater valuation of in-group, authority and purity concerns is attributable to higher levels of authoritarianism”. In support of this finding, our PCA analysis revealed that the first factor was mainly loaded by the following variables: RWA social attitudes (.78), and purity/sanctity (.85), respect for authority (.83) and in-group loyalty (.70) as moral values. So, we have an additional reason to believe that an interaction with a political leader is marked by top-down regulation, in which social attitudes and moral values affect the decision-making processes to trust or not to trust a leader.*

*We expanded the paragraph accordingly to include more extensive explanations (please refer to [page 8, lines 18-32](#)).*

*Finally, the studies by Luizza et al., (2011) and Porciello et al., (2016) involving gaze-following behavior of RW- and LW- Italian voters are referenced as relevant for our case, since they provide behavioral and physiological evidence about the capability of a conservative leader to exert influence over his followers (as compared to leftwingers). Moreover, by highlighting the behavioral (i.e., oculomotor) changes of RW-participants in response to the authority of their leader (again represented by the same person i.e., Silvio Berlusconi), these studies provide evidence that the observed difference between conservatives and liberals might be due to their heightened sensitivity toward the authority of the leader (Altemeyer 1996), rather than being more loyal to their own group (Haidt and Graham, 2007; Graham et al., 2009). According to us, this is in line with the results reported in our manuscript on the economic behavior towards the conservative leader and the ideological dispositions of the voters.*



## Appendix B



SAPIENZA  
UNIVERSITÀ DI ROMA

To:

**Dr. Antonia Hamilton (Subject Editor)**

Dr. Molly Crockett (Associate Editor)  
Dr. Andrew Dunn (Senior Publishing Editor)  
at *Royal Society Open Science*

Date/Place:

**1 May 2019, Rome, IT**

**SUBJECT:**

**Re-submission of the research article RSOS-182023 entitled “Bound to the group and blinded by the leader: ideological leader-follower dynamics in a trust economic game”** (originally titled “In leaders we trust: right-wing electors blindly invest in their political leader in an economic trust game”)

Dear Editors at *Royal Society Open Science*

Dr. Antonia Hamilton and Dr. Molly Crockett,

We would like to express our gratitude to the Team of Editors and the Team of Reviewers at the *Royal Society Open Science*, for the expert handling of the manuscript by Gjoneska, Liuzza, Porciello, Caprara and Aglioti, originally entitled “In leaders we trust: right-wing electors blindly invest in their political leader in an economic trust game”, and (following a substantial revision) updated to “**Bound to the group and blinded by the leader: Ideological leader-follower dynamics in a trust economic game**”. Also, we thank you for allowing us to revise the manuscript along lines that proved very helpful in our striving to improve it.

We hereby confirm that we did follow the main recommendation by the Associate Editor “*to address a number of substantial matters*” and we did our best to “*ensure that we resolved the major concerns by the reviewers*”. This is evident in the *considerable interventions at all crucial points of the manuscript* (i.e., the title, the abstract, the introduction, the discussion and conclusions). They are introduced for the purpose of *shifting the focus of the study, from highlighting the right-wing/left-wing differences when relating to a political leader* (as was the case in the first version), *to highlighting the group-differences when relating to in-group/out-group political leader* (as is the

case in the updated version). In this way, we have moved away from the claims which are yet to be supported by other studies, towards the claims that are clearly evidenced in our results.

We believe that *the new material is framed more precisely and concisely, in a more constrained and cautious manner*, thus it is in good accordance to the main comments and concerns, suggestions and recommendations, from the editor and the reviewers.

In addition, please refer to the rebuttal letter containing our response (which is marked in **bold**) to the reviewers' comments (which are cited in "quotes", marked with *bold and italic*, and **highlighted in blue**). The revised segments of the manuscript are also included in the response (and cited in "quotes", plus **highlighted in yellow**).

**We do hope that you and the reviewers will find the response to be clear and that the manuscript is now suitable for publication in the *Royal Society Open Science*.**

**On behalf of all authors we thank you.**

Sincerely yours,

**Salvatore M. Aglioti and Biljana Gjoneska**

The image shows two handwritten signatures in black ink. The signature on the left is 'Salvatore M. Aglioti' and the signature on the right is 'Biljana Gjoneska'.

### **Social and Cognitive Neuroscience Laboratory**

Department of Psychology

School of Medicine and Psychology

Sapienza University of Rome

Postal Address: Via dei Marsi 78, 00185, Roma, Italy

Web Address: <https://agliotilab.org/>

### **Correspondence**

Biljana Gjoneska: [biljanagjoneska@manu.edu.mk](mailto:biljanagjoneska@manu.edu.mk)

Salvatore M. Aglioti: [salvatoremaria.aglioti@uniroma1.it](mailto:salvatoremaria.aglioti@uniroma1.it)



SAPIENZA  
UNIVERSITÀ DI ROMA

## RESPONSE TO REVIEWERS

### Introductory remarks:

The following response contains a comprehensive explanation for each intervention, made at crucial points of the manuscript. All revisions have been implemented for the purpose of providing information which is strictly related to specific testing conditions i.e., when supporting/opposing group of voters (in the role of trustors), are playing with an in-group/out-group RW-leader or a famous non-politician (in the role of trustees) an iterated version of the trust economic game. Hence, the entire material is restructured in order to refrain from extending conclusions to conditions that are not included in our experiment (e.g., playing a game with a LW-leader in the role of a trustee). In this way, the study manages to compensate for the lack of suggested condition, because such condition could not be introduced under the current circumstances due to: the temporal constraints (i.e., short time-window for the replication of the experiment), political constraints (i.e., changed political climate, compared to the period when the experiment was conducted), and the methodological constraints (i.e., the unavailability of same voters, or a pool of voters with similar specifics as the ones in our initial experiment). As a result, the rebuttal letter will focus on answering the suggestions/comments from reviewers which are still applicable for the new version of the restructured manuscript.

### Legend:

In the following lines we will provide precise order of all interventions in the revised manuscript, along with exhaustive explanations for each modification. Our response will be marked **in bold**, while the revised excerpts from the manuscript will be copied, quoted and **highlighted in yellow**. Also, the addressed comments from the reviewers will be quoted and **highlighted in blue**, and marked with ***bold and italic*** across the text.

## I. Adaptation of the TITLE

The new version of the title reads **“BOUND TO THE GROUP AND BLINDED BY THE LEADER: IDEOLOGICAL LEADER-FOLLOWER DYNAMICS IN A TRUST ECONOMIC GAME”**

This modification is introduced, in direct response to the comments from Reviewer 1. Also, it is in line with his/her suggestions (made on both rounds of the revision) which are cited as follows:

- *“At minimum, if a left-wing politician condition cannot be included, I think the language about the ideological differences should be softened substantially”* (First revision)

- *“At minimum, I think the language about the design and the parameters that are actually being tested would be better served with greater constraint and precision”* (Second revision)

The rationale for such intervention is structured around three key-points and explained as follows:

**1. The whole title is framed in a more precise manner**, in order to directly address the concrete results from our study. Specifically, the revised version of title (i.e., “bound to the group and blinded by the leader”), pertains to the factual and tangible evidence on moral values and social attitudes of voters (extracted with Principal Component Analysis from the corresponding questionnaires), in relation to their economic behavior (driven by their dis/trust towards an in-group/out-group leader). Namely, the analysis has shown that the observed changes in voters’ trust economic behavior (or lack of any thereof), were due to their inclination for in-group loyalty and respect for the authority of the in-group leader, so this conclusion is synthesized in the first part of the title. In addition, the subtitle (i.e., “ideological leader-follower dynamics in a trust economic game”) emphasizes the setting and the circumstances under which the results emerged. Namely, it serves to provide information about the methodology (i.e., trust economic game) and the experimental design (i.e., game designed to investigate ideological leader-follower dynamics), rather than speculations about the causality of the results (as was the case with the original title).

**2. The new title is framed in a more constrained manner** in order to avoid any inferred messages, potential interpretations, possible implications, or any hints whatsoever, which did not stem from our results. Namely, the new title restrains from mentioning (or hinting at) potential ideological asymmetry between the RW/LW group of voters, since this was not directly tested in our experiment, and it is not supported by our data.

**3. The new title is framed in a more general manner**, in order to focus on the more universal intergroup processes and in-group biases, rather than what might turn to be a single-case scenario (if our pioneering study is not replicated in future studies utilizing different controls, or other political contexts).

## II. Adaptations in the ABSTRACT

The new version includes the following modifications of the abstract (highlighted in yellow):

**“Results revealed that depending on the group, voters either relied on the situation and adjusted to the behavior of the out-group leader (in our case left-wing voters), or on their disposition for group-loyalty with respect for authority, thus failing to adjust to the behavior of the in-group leader (in our case right-wing voters). Our findings suggest that: a) complex voter-leader relations in politics, are reflected in the simple trustor-trustee financial interactions from behavioral economics and b) being bound to one’s group and one’s leader may affect the trust economic decisions of the followers.”**

The modifications are introduced as a result of the insightful observations by Reviewer 1, cited as follows:

*“There are many points in the manuscript that suggest an ideological asymmetry that I just don’t think is supported by the data. For example, in the abstract, it is stated that ‘results revealed that left-wing voters relied on the situation (trustee’s behavior), while right-wing voters did not’. This suggests an asymmetry between left wingers and right wingers, and it is not supported by the data—both left wingers and right wingers updated their investment behavior in response to the non-politician.”*

The rationale for the modifications is structured around two key-points, and explained as follows:

**1. The focus of the study is shifted**, from highlighting the RW/LW differences when relating to a political leader (as was the case in the first version), to highlighting group-differences when relating to in-group/out-group political leader (as is the case in the updated version of the abstract). In such a way, we have implemented the reviewer’s recommendation and moved away from the potential claim about an emerging ideological asymmetry (since this remains to be supported with additional studies), towards the claim about being biased when playing with one’s own leader (since this is evidenced in

the results). Hence, the language about the ideological differences is softened considerably, as was originally suggested by Reviewer 1.

**2. The focus of the study is sharpened**, and better structured to delineate a) the investigation of the general dynamics in a leader-follower trust economic game, and b) the investigation on the mentioned group-differences when relating to in-group/out-group political leader. This was done in synchrony with the adaptations in the title.

### III. Adaptations in the INTRODUCTION

The specific additions in the introduction (highlighted in yellow), are cited as follows:

**“Furthermore, voters who score higher on binding moral values tend to support social attitudes that lead to in-group favoritism, with promotion of social hierarchy and inequality [11, 12]. This in turn, may lead to biased perception about trustworthiness of in-group members (especially if they are leaders placed high on the hierarchical ladder), and may produce bias in variety of social behaviors. The bias may also become evident on daily bases, and reflected in the daily decisions to trust like-minded partisans not only on political issues but also on unrelated, non-political matters (the so-called “epistemic spillover”) [13]. For example, Marks et al., found that the similarity with one’s political views affects one’s ability to make accurate assessment about their fellow’s expertise in the domain of geometric shapes. Moreover, trusting in-group politicians (especially when they are powerful leaders) can happen even when this implies spreading disinformation [14].”** (page 2, lines 24-32)

The additional information is inserted in response to the insightful observations and useful suggestion by Reviewer 1, cited as follows:

*“Much of the text suggests that the authors are exploring a balanced design (e.g., on p. 2: ‘we were able to capture the initial trust of LW vs. RW participants towards an in-group vs. out-group leader, hence potential positive vs. negative bias toward him’), but the design simply tests an in-group politician for RW participants and an out-group politician for LW participants. At minimum, I think the language about the design and the parameters that are actually being tested would be better served with greater constraint and precision”.*

Specifically, the introductory segment is inserted for the purpose of providing context to our findings (which are described later in the manuscript). Namely, it provides information on two key-concepts:

1. The so-called “epistemic spillover” i.e., the general tendency to trust like-minded individuals, which may result in bias toward in-group politicians.
2. The in-group favoritism (linked to political intergroup relations) i.e., the tendency to trust in-group partisans or political leaders, which stems from moral values and social attitudes of voters.

Thus, the inserted segments provide clues on the relationship between the ensuing results from the economic trust game, and the results from PCA analysis on moral values and social attitudes of voters. The more elaborated insight on the nature of this relationship is detailed in the closing discussion of the paper.

#### **IV. Adaptations in the MATERIALS AND METHODS**

The explanations regarding the different periods/seasons for realization of the main/control experiment, are highlighted (in yellow) and copied below:

**“Two experiments were conducted in two consecutive periods during 2014 (Exp 1: January-July and Exp 2: October-December) with the use of two famous characters in the role of trustee as a main difference. Specifically, the main experiment (Exp 1) utilized Silvio Berlusconi, former Prime Minister of Italy and leader of the center-right parties' coalition, while the control (Exp 2) utilized Piero Angela, a famous TV host. We decided to conduct our main experiment throughout one continual semester, specifically for the purpose of avoiding the confound of the season on the public perception of Berlusconi. Namely, we wanted to avoid the possibility that unexpected political developments might affect the public image of Berlusconi. Indeed, a political trust-index may quickly fluctuate due to the constant political engagements and public affairs of the concerned leader. However, no newsworthy political events happened throughout the period of Exp1. This was also evidenced in the index of trust towards Berlusconi which was monitored with bimonthly reports obtained by “Istituto Piepoli” (an agency specialized in marketing and opinion research) revealing 31%, 31%, and 34% of the total voting-pool, for the months of January, April, and June.”** (page 4, lines 53-58)

**“..In addition, we did not expect considerable fluctuation in the public perception of Angela, hence we were not restrained by the season for the Exp2. He is a famous non-politician with long-term media presence, but stable public appearance. This was confirmed in both, the pilot study and the experimental study, where participants on both sides did not differ in their perception of Angela and considered him as a relatively neutral character.”** (page 5, lines 32-36)

The additional information is provided in concordance with the recommendations by Reviewer 1, and follows faithfully his/her instructions, which are cited in the following segment:

*“Finally, I had not noticed the seasonal confound of the conditions in this experiment in my initial review, but I think it would be helpful to see more explanation about why running the two conditions in totally different seasons is not a worrisome confound. If participants had been randomly assigned to condition within the same season of data collection, the authors would still not have had the concern that perceptions of Berlusconi would be changing. I think it would be helpful to demonstrate that there were no newsworthy events in terms of politics or entertainment during or between the two seasons of data collection that could have affected participants’ perceptions.”*

## **V. Adaptation in the RESULTS**

The main intervention in this part of the manuscript, includes the title of the section about the Principal Component Analysis (PCA) from data, regarding the moral values and social attitudes of voters. It was formerly known as "Inferred ideology as indicator of economic behavior" while the updated version is highlighted below (in yellow) and now reads as follows: **“GROUP BINDING DIMENSION AS POSSIBLE INDICATOR OF ECONOMIC BEHAVIOR”** (page 7, line 26)

Consequently, we adapted segments belonging to this section which described the results from the PCA analysis i.e., the emerging set of factors (Group Binding Dimension and the Social Equality Dimension). The new passage now reads as follows:

**“The first factor was named Group Binding Dimension, since it comprised binding moral values together with the RWA attitudes, thus tapping onto the social conformity construct. The second factor was named Social Equality Dimension, since it comprised the remaining moral values concerned with fairness and harm reduction (individualizing MFQ variables), decreased proneness to hierarchy (SDO) and legitimization of economic inequality (ESJ), thus tapping onto the social equality construct. Clearly, the first factor is associated with group-centrism and**



**possible group-related favoritism, so we decided to proceed with the investigation on the interaction between the degree of Group binding dimension and the economic behavior of voters indexed by the average amount of investment.”** (page 7, lines 42-51)

The PCA was obtained from the voters' responses on Moral Foundation Questionnaire, Right-Wing Authoritarianism Questionnaire, Social Dominance Orientation Scale and Economic System Justification Questionnaire. As mentioned, it resulted in two emerging factors, which were originally named Social Conservatism and Economic Liberalism. However, in the revised version of the manuscript we decided to rename the factors into Group Binding and Social Equality Dimension, accordingly. We believe that the updated titles are more suitable for the following reasons:

- They are better coordinated with the rest of content and the presenting style of the revised manuscript. Specifically, the title of the first factor addresses directly the possible reasons for the demonstrated in-group bias (for the group of supporting voters towards their own leader) i.e., the group conformity.
- The updated names are more accurate and better corresponding with their constituting variables. Specifically, the first factor which is comprised of the so-called binding group of moral values (i.e., Group Loyalty, Respect for Authority, and Purity/Sanctity) and the Right-Wing Authoritarianism attitudes, is re-named in such a way, as to address the common denominators and the main hallmarks of the tendency to comply and conform with one's own group.
- Finally, the updated name of the first factor, is better coordinated with the existing literature, and continues the thread about the positive correlation between the authoritarianism attitudes and the endorsement of binding moral foundations (Kugler et al., 2014).

As for the technical aspects of the RESULTS section, we followed the suggestions by Reviewer 2 to **“specify clearly what the IV, DV, and covariates are to the reader”** and properly annotated the variables where applicable. Most importantly, we clarified that the Group Binding Dimension was used **“as a single-item measure”** and **“the IV in our analyses”**, as per suggestion from Reviewer 2.

## V. Adaptations in the DISCUSSION

We hereby confirm that the Discussion underwent most extensive restructuring, in order to fit with the more rigorous style in presenting/interpreting facts and results, and thus complies with reviewers' suggestions.

Specifically, in the updated version of the Discussion we removed all arguments and theoretical concepts regarding about the so-called "cognitive rigidity" or "holistic cognition" which were formerly associated with the behavior of the RW-group toward their leader. Namely, they were neither directly tested nor manipulated in our study, and were linked only hypothetically with the interpretation of our results, so we decided to abstain from mentioning them.

This was done in accordance with the decision to provide more factual (rather than hypothetical) shaping of the manuscript, and in concordance with the following suggestion from Reviewer 2:

*"It would be important for the authors to completely flesh out why adjustment/trustworthiness were considered to be proxies for the "cognitive rigidity" concept. Their theoretical links could benefit from guided clarity. I read too many names of concepts and mechanisms and did not see how those were manipulated or measured in the study, or how they were related to the relationship between ideology and trust. The mechanisms were technically not directly tested, but were rather hypothesized. Maybe further studies could elaborate on the mechanisms."*

The removed arguments, were replaced with a more elaborated emphasis on our main results. In the following lines we will copy the excerpts which are self-explanatory and expand on the concept of the in-group political bias.

**"Our central finding (related to the lack of adjustment in the group who played with their un/trustworthy political leader) provides evidence beyond the existing literature on the intergroup ideological bias (i.e., the automatic preference for the members of one's own political group), guided by the preference for one's own political leader. Also, it supports the so-called 'epistemic spillover', a flawed heuristic of trusting like-minded political figures in non-political matters (in this case, economic trust decisions in an interactive game). Moreover, our findings suggest the mechanisms that are at the core of ideological intergroup biases, by highlighting the role of two important dimensions, especially prominent in RW-voters: a) the strong group-**

binding moral values and b) the respect for the in-group authority figures (i.e., powerful leaders).” (page 8, lines 27-35)

“These results are in line with the Social Identity Theory regarding expressive partisan identity [7], the Moral Foundation Theory (MFT) and the Right-Wing Authoritarianism Theory (RWA) [8, 9, 10, 24]. According to MFT, the five basic moral foundations (harm/care, fairness/reciprocity, in-group/loyalty, authority/respect and purity/sanctity), collapse into two super-ordinate foundations. Specifically, the first couple of values are labeled as individualizing foundations (generally oriented toward protection and fair treatment of individuals), while the remaining three as binding foundations (focused on protection of the group, collectives, institutions). The binding foundations include: a) patriotism and self-sacrifice for one’s group (in-group loyalty); b) concerns about the importance of social order, traditions and respect for leadership (authority/respect) and; c) prevalence of spiritual over the carnal nature of humans (purity/sanctity). The political identity largely shapes people’s moral foundations, with LW-voters endorsing the individualizing foundations, while RW-voters ascribing same or higher moral relevance to the binding foundations. The latter group of values have been examined in the context of immorality i.e., ‘unacceptable behavior, such as blind obedience and stigma’ [9].” (page 8, lines 49-58; page 9, lines 6-10)

“In an analogous fashion, voters can ‘use the perceived credibility of political figures as a heuristic to guide their evaluations’ of what is right or wrong, and decisions of whether to trust or not i.e., the effect known as ‘epistemic spillover’ [13, 14]. Accordingly, our previous studies have already shown that the perceived similarity between voters’ and leaders’ personality, can influence even the basic cognitive processes of voters, such as attentional gaze capture [4, 16, 28]. Our current experiment provides more direct evidence, showing that voters’ shared political ideology with an in-group political leader ‘spills over’ to their economic decision-making processes in a trust economic game (i.e., unrelated, non-political context).” (page 9, lines 34-42)

As a concluding remark, the ultimate reason for adding more elaborate explanations regarding the obtained results, is the striving toward improved understanding about in-group political bias, and the situations/circumstances under which it may appear.

## VI. Adaptations in the REFERENCED LITERATURE

Along with the removal of the arguments on the concepts of “cognitive rigidity” or “holistic cognition” (formerly presented in association to the cognitive styles of conservative voters), their supporting literature was also removed from the reference list (as unrelated and irrelevant for the restructured version of the manuscript).

Instead, additional set of references were introduced regarding the flawed heuristics, and potential in-group political biases of voters. Specifically, the following references were added to the list:

**[13] Marks J, Copland E, Loh E, Sunstein CR, Sharot T. 2018. Epistemic spillovers: Learning others' political views reduces the ability to assess and use their expertise in nonpolitical domains. *Cognition*. (doi: 10.1016/j.cognition.2018.10.003).**

**[14] Swire B, Berinsky AJ, Lewandowsky S, Ecker UK. 2017. Processing political misinformation: comprehending the trump phenomenon. *R. Soc. Open. Sci.* 4(3):160802. (doi: 10.1098/rsos.160802).**

**[34] Schepisi M, Panasiti MS, Porciello G, Bufalari I, Aglioti SM. 2019. Left threatened by right: political intergroup bias in the contemporary italian context. *Front. Psychol.* 10:26. (doi: 10.3389/fpsyg.2019.00026).**

## Appendix C



SAPIENZA  
UNIVERSITÀ DI ROMA

### RESPONSE TO THE REVIEWER

We thank the reviewer for the final round of comments with clear, concise and concrete messages. All along the revision process, they repeatedly proved to be very insightful and helpful in resolving all remaining dilemmas. In addition, we are grateful for the continual patience and diligence with the revision, and feel compelled to include a mention in the acknowledgment section. The shared efforts in our joint quest toward perfecting of the material were indeed essential in achieving what we believe is a well-balanced and well-rounded story.

We followed the recommendation of the RSOS Editors, and compiled our thoughtfully premeditated response, to be as specific as possible in addressing the minor remaining issues. We also revised the manuscript accordingly. We thus believe to have substantially improved the overall clarity of the manuscript, and it is our most sincere hope that the response will help in reaching a shared and satisfied regard on the material at hand.

#### Legend:

The reviewer's comments are cited in "quotes", marked ***with bold and italics, and highlighted in red.*** The revised segments of the manuscript are also are copied as cited in "quotes", **marked with bold, plus highlighted in yellow.** In the framework of this response, a copy of the updated manuscript is also provided (**highlighting the revised segments in yellow**).

Sincerely,

The authors



**COMMENT No.1**

**(1) “The added reasoning about the season/condition confound in the experiment is helpful, but it does not fully reassure the reader that there is not a seasonal (perception) confound with the treatment conditions that could be potentially affecting participants’ behavior. I think the clearest way to show that the season of experimental administration did not affect the experiment would be to show (relative) invariability in public perceptions of both Berlusconi and Angela over the full span of the experiment, January to December (not just Berlusconi and not just January to June). If the authors have access to such perception polls, it would do a lot to address the confound.”**

RESPONSE:

Once again, we are grateful for the continual striving toward clarification of all potentially unresolved dilemmas. More importantly, we thank the reviewer for suggesting concrete steps to resolve this specific matter. In the case of Berlusconi, we do have access to public perception polls for the mentioned period, and we include them in the revised manuscript in the following manner:

**“We conducted our main experiment over the course of one semester, for the purpose of avoiding unexpected political developments which could affect the public image, and result with fluctuations in the public trust-index toward Berlusconi. In order to control for a potential seasonal confound, we also consulted public electoral and political polls (managed by the Presidency of Ministers and the Italian Department of Information and Publishing)<sup>1</sup>. Only one agency (“IPR Marketing”) provided reports throughout the whole year (December 2013, May 2014, December 2014). According to these reports trust-index toward Berlusconi proved to be fairly consistent for the investigated period (25%, 23% and 20% respectively).”** (page 5, lines 1-9)

As for the control character (i.e., Piero Angela), in the absence of similar public perception polls (since he is not a politician and public decision-maker), we resorted to the results from the pilot study (conducted at the start of the experimental period), and the experimental study (conducted all through the end of the experimental period), and reported them accordingly. The copied excerpt

---

1 Accessed through the website <http://sondaggipoliticoelettorali.it/>



refers only to the part of the manuscript which was revised in accordance with the suggestion by the reviewer. For comprehensive information regarding the performed analyses and the obtained results, please refer to the preceding/following segments which were already included in the manuscript.

**“In addition, we did not expect considerable fluctuation in the public perception of Angela, because he is a famous non-politician with long-term media presence, but stable public appearance. Hence, we were not restricted by the period and conducted our Exp. 2 in the second half of 2014. However, in order to control for the potential seasonal confound, we relied on our studies (since there are no available public perception polls for Angela). Namely, in our pilot (conducted at the beginning of 2014) and the experimental study (conducted toward the end of 2014), the participants on both sides of the political spectrum, did not differ significantly in their perception of Angela and considered him as a relatively neutral character.”** (page 5, lines 33-40)

Also, we performed an exploratory search through the scientific databases, on the potential influence of the season in the outcomes of an economic trust game. To the best of our knowledge (and given the restricted period), we could not detect any such study confirming (or even exploring) the relationship. However, we reserved the possibility for such explorations in the future, by including a mention in the discussion section.

**“Future studies with longitudinal explorations (spanning across multiple seasons), and diverse geopolitical settings (especially countries with a strong left-wing equivalent), will shed important light on the subject.”** (page 10, lines 39-42)

#### **COMMENT No.2**

**(2) “I think the reported group binding model is not as informative as it could be. It seems that the purpose of including this analysis is to demonstrate that this group binding dimension helps to explain why RW participants might be exhibiting this trusting behavior of Berlusconi. But the included model simply shows that people who are higher in group binding psychological preferences also exhibit this trusting behavior. I think it would make more sense to include these**



*psychological variables with (rather than instead of) the ideology variable in the model to see if the psychological variables help to explain the relationship between ideology and behavior. Furthermore, it would be even more informative—given these variables were measured—to include not only the group binding measure but also the social equality measure in the model to test whether the group binding measure does a better job of explaining the variance than preferences for equality, as the authors may be suggesting. At minimum, it seems plausible that participants' economic preferences and their perceptions of Berlusconi's economic positions could play a role in their experimental behavior."*

The analysis on the group binding dimension primarily serves to provide an explanation for the economic behavior of the groups of participants toward an in-group/out-group leader (as compared to a control). However, the participants were divided according to their ideology (in LW/RW group), so the results obtained from the analysis on the group-binding dimension, can also serve to provide an indirect (inferred or implied) insight, on the link between the political ideology and economic behavior, when relating to an in-group/out-group leader. In that sense, the reviewer's remark is indeed: a) very intuitive, as there was a statistically significant positive correlation ( $r = 0.71$ ,  $p < .001$ ) between the two variables (i.e., self-reported ideology and the group-binding dimension); and b) much in line with the existing literature showing that those two variables are indeed strongly related (Kugler, 2014). The significant positive correlation between the variables was the main reason why we decided not to include both in the same linear mixed effects model, since they break one of the underlying assumptions of non-collinearity and suffer from redundancy. We also updated the manuscript accordingly, by adding the correlation results as follows:

**"Specifically, we decided to repeat the aforementioned LME with only one procedural modification: the self-reported political group in the full model i.e., Group (RW/LW) was substituted with the score on the Group binding dimension (extracted with PCA from the questionnaires and used as a single-item measure i.e., independent variable), since the correlation between the two variables was strong ( $r = 0.71$ ,  $p < .001$ )."** (page 8, lines 4-8)





As for the notion regarding the inclusion of the Social equality measure in the LME analysis, we hereby like to confirm that we did run the required analysis, and in accordance with our expectations, the results revealed that the full-interaction model was not marked by AIC drop, nor by significant change in the LR (as compared to its nested model). This served as an additional confirmation for the decision to focus on the group-binding dimension in our analysis, which indeed yielded additional insight on the economic behavior of the participants when playing with an in-group/out-group leader. However, to provide all the details related to our study, we have included the negative results of this analysis in the SI (pages 9-10).

**COMMENT No. 3**

***(3) “A very minor point: How correlated was participants’ voting behavior in the past three elections with their explicit political orientation (p. 15)? It’s stated that this question was included to verify participants’ understanding of their own ideology, but how this information was used would be even more helpful.”***

The reviewer is right to observe that an explanation regarding the past voting behavior, would increase the understanding on its particular role in the experiment. Therefore, we use the opportunity to clarify that these data were employed as an additional control upon selection of participants (i.e., an extra safety measure, since otherwise, the selection would rely solely on the self-reported political orientation). Namely, the main purpose of those control questions was to detect participants with conflicting responses (i.e., those who self-identified as belonging to one of the RW/LW groups, while stated to have voted for a party belonging to the other LW/RW group), and to exclude them from the experiment. A summary explanation is also added in the manuscript:

**“The questions regarding the past voting behavior were introduced for the purpose of excluding participants who did not have a clear idea about their political orientation and gave conflicting responses (e.g., self-identified as pro-left, while reported voting for pro-right political parties, and vice versa).”** (page 4, lines 14-17)



However, in order to directly address the question on the relationship between the self-identified political orientation on one hand, and the actual political choices of our participants on the other, we ran a rank-biserial correlation between the two variables. Participants' political orientation was measured via direct question i.e., by asking them to self-place on a 7-point Likert-type item (1="extremely left"; 2="left"; 3="center-left"; 4="center-right"; 5="right"; 6="extremely right", 7="apolitical"). Those choosing "7" were coded as "N/A". Participants' party preference at the recent elections was coded on a binomial scale and two groups were created: a group who voted for pro-RW parties (coded as "1") and a group of participants voting for pro-LW parties (coded as "0"), while those who chose "a big tent" party (like "Movimento 5 Stelle") or abstained from voting, were coded as "N/A". The results revealed a rank-biserial coefficient  $r_{rb} = .95$  (Glass, 1965)<sup>2</sup>. Hence, it is safe to conclude that subjective declaration of one's political orientation, and one's objective voting behavior proved to be mutually correlated. In this way participants' self-assignment to one of the groups (LW/RW) was verified.

---

2 Glass, G. V. (1965). A ranking variable analogue of biserial correlation: Implications for short-cut item analysis. *Journal of Educational Measurement*, 2(1), 91-95.



**COMMENT No. 4**

***(4) “Finally, as I mentioned in my initial review, it would be helpful to include some discussion about the political implications of these results. That is, how does this simulated one-on-one trust game exchange with a famous politician (which is unlikely to happen in the real world) reflect realistic voter behavior and experience? It would be really helpful to make the potential links between the experimental context and actual political outcomes more explicit.”***

We agree with the perceptive remark that the voter-leader interactions in the real world (as opposed to those in the experimental context) may seem more distant, less tangible and foreseeable, if not properly highlighted (through potential links). In fact, we believe that this is an excellent observation as it provided a rationale for our key opening point of the discussion. Therefore, we included the possible analogies and implications of the tested voter-leader interaction, in the introductory part of the discussion which now opens as follows:

**“The trust-game dynamics between the political leaders and their devoted followers, occurs on a daily basis. The leaders usually assume a role of trustworthy subjects, by offering economic incentives (investments, credits and other financial benefits) to their trusting followers. In addition, the trust-game dynamics is also reflected in the fact that each voter is also a tax-payer (i.e., trustor), while the political leaders with governmental experience are decision-makers (i.e., trustees). They can choose to spend the budget for societal improvements (thus returning the trust and behaving trustworthy), or for their own benefits (thus behaving in an untrustworthy manner). Our approach allowed us to shed light on important aspects of these voter-leader interactions.”** (page 8, lines 18-

25)

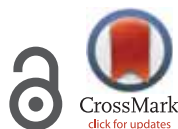

**Subject Category:**

Psychology and cognitive  
neuroscience

**Subject Areas:**

group behavior, human  
decision-making, trust

**Keywords:**

group hierarchy, leadership, political  
bias, trust game

**Author for correspondence:**

**Biljana Gjoneska**

e-mail:

[biljanagjoneska@manu.edu.mk](mailto:biljanagjoneska@manu.edu.mk)

**Salvatore Maria Aglioti**

e-mail:

[salvatoremaria.aglioti@uniroma1.it](mailto:salvatoremaria.aglioti@uniroma1.it)

Bound to the group and  
blinded by the leader:  
Ideological leader-follower  
dynamics in a trust economic  
game

Biljana Gjoneska<sup>1,2,3</sup>, Marco Tullio

Liuzza<sup>2,3,4</sup>, Giuseppina Porciello<sup>2,3</sup>, Gian

Vittorio Caprara<sup>2</sup> and Salvatore M.

Aglioti<sup>3,5</sup>

<sup>1</sup>Academy of Sciences and Arts of North Macedonia

<sup>2</sup>Department of Psychology, "Sapienza" University of  
Rome, Italy

<sup>3</sup>IRCCS Santa Lucia Foundation, Rome, Italy

<sup>4</sup>Department of Surgical and Medical Sciences,  
"Magna Graecia" University of Catanzaro, Italy

<sup>5</sup>Department of Psychology, Sapienza University of  
Rome & CLNS@SAPIENZA at the Italian Institute of  
Technology, Rome, Italy

Understanding the dynamics of trustworthiness in ideological contexts could influence human societies, affect electoral campaigns and ultimately impact democracy. We tested trust behavior towards political leaders in a sample of 121 opposing/supporting voters assigned as trustors in an iterative Trust Game (TG). In two experiments, a famous Italian conservative leader (i.e., Silvio Berlusconi) or a famous non-politician were used as trustees in a predefined un/trustworthy TG, while trustors believed that mathematical algorithms reproduced trustee's real behavior. Results revealed that depending on the group, voters either relied on the situation and adjusted to the behavior of the out-group leader (in our case left-wing voters), or on their disposition for group-loyalty with respect for authority, thus failing to adjust to the behavior of the in-group leader (in our case right-wing voters). Our findings suggest that: a) complex voter-leader relations in politics, are reflected in the simple trustor-trustee financial interactions from behavioral economics and b) being bound to one's group and one's leader may affect the trust economic decisions of the followers.

## 1. Background

Trust (i.e., the willingness to expose vulnerability to a trustee based on positive expectations that it will not be misused for harmful purposes) and trustworthiness (i.e., perception of benevolence and reliability of a trustee) influence every social exchange, be it personal or professional, economical or political. People largely rely on trust when relating to others whether they are close friends, financial advisers, or political leaders. Mounting behavioral and neural evidence indicates that trustworthiness evaluations of unfamiliar persons are made rapidly (in less than 100 ms) [1] and automatically [2]. However, situational and dispositional factors may affect trust and trustworthiness judgments, and impact basic social behaviors. Humans, like other social species, naturally tend to coalesce in groups along one or more dimensions (race, ethnicity, religion, sexual orientation, political affiliation) [3, 4]. Grouping seems to imply that people are inclined to prefer the fellow members of their own group, not only when the group is meaningful but also within communities simply sharing arbitrary labels [5]. Political ideology, through cohesion of certain racial, ethnic and religious groups creates shared outlook, induces strong feelings of group-identification and represents a strong motif for group-differentiation [6, 7].

Theories from political psychology (Moral Foundation Theory, Right-Wing Authoritarianism Theory and Social Identity Theory regarding political affiliation) indicate that group-related political bias may be characterized by the group-cohesive moral dimension and the authoritarian submission dimension [7, 8, 9, 10]. While individualizing moral values (like fairness and reciprocity, with care for others and harm-sensitivity) are common for right and left ideologies, binding moral values (like in-group loyalty, respect for authority and concern for religious purity within one's own community) characterize specific partisanships, i.e., right-wing parties [8, 9]. Furthermore, voters who score higher on binding moral values tend to support social attitudes that lead to in-group favoritism, with promotion of social hierarchy and inequality [11, 12]. This in turn, may lead to biased perception about trustworthiness of in-group members (especially if they are leaders placed high on the hierarchical ladder), and may produce bias in variety of social behaviors. The bias may also become evident on daily bases, and reflected in the daily decisions to trust like-minded partisanships, not only on political issues but also on unrelated, non-political matters (the so-called "epistemic spillover") [13]. For example, Marks et al., found that the similarity with one's political views affects one's ability to make accurate assessment about their fellow's expertise in the domain of geometric shapes. Moreover, trusting in-group politicians (especially when they are powerful leaders) can happen even when this implies spreading disinformation [14].

It is also worth noting that in complex leaders-voters dynamic, the former are responsible for setting in motion political systems as services for the common good. Leaders use extended media presence in order to exert influence over potential voters, by means of projecting admirable personality traits, portraying them as desirable candidates [15, 16]. Hence their roles (e.g., leaders as trustworthy and voters as trusting subjects) and the incentives (e.g., economic offers) may be reflected in the experimental design of the Trust Game (TG), a paradigm that has proved useful for the study of decision-making in an interactive fashion [17].

Although the TG has already been utilized to model political relations [18, 19], or measure political bias [5, 20, 21, 22], the trustees were either explicitly introduced as peers (through a short, written profile) [20] or implicitly inferred as such (by presenting unknown candidates for runner-ups) [21], but never distinctly associated with the persona of a renowned political leader.

To the best of our knowledge, we are the first to explore the temporal unfolding of trust in a hierarchical voter-leader, iterated economic interaction. Specifically, we explored how the (un)trustworthy behavior of a famous political leader shapes the behavior of opposing (in our case LW) or supporting (in our case RW) group of voters. More specifically, we tested if and how the trust-behavior of the voter depends on their own and leader's political orientation, as well as their mutual economic interaction. Note that in a standard TG an investor/trustor and a partner/trustee interact by exchanging money. The trustor is endowed with a fixed amount

1 of money and informed about the opportunity to make an offer to the trustee. The money  
2 offered is then multiplied by the experimenter (usually by a factor of 3 or 4) and transferred  
3 to the trustee who has the opportunity to keep the multiplied amount of money or transfer back  
4 some of it, thus behaving fairly or not. We utilized a computerized TG, modified in accordance  
5 to Chang and colleagues [23] to test 58 right (RW) and 63 left (LW) politically oriented Italian  
6 voters. Participants believed that they played with an algorithm simulating either the behavior  
7 of Silvio Berlusconi, SB (former Prime Minister of Italy and leader of the center-right coalition)  
8 or Piero Angela, PA (TV personality and writer of science-related popular books i.e., a famous  
9 age-matched non-politician). In reality, participants were assigned to a version of the TG where  
10 the trustee could behave in a trustworthy (i.e., reciprocate 80% of the time) or untrustworthy  
11 (i.e., reciprocate 20% of the time) fashion. With the implementation of this experimental design  
12 we were able to capture the initial trust in two groups of participants towards an in-group vs.  
13 out-group leader (hence detect potential positive vs. negative bias toward him), and manipulate  
14 the leader's trustworthiness by obtaining a measure of change in participants' trust index. A  
15 schematic representation of the experimental task is provided in Fig. 1.

16 We hypothesized that the overall dynamics of trust would unfold in the following manner:  
17 in the supporting group of voters we expected an in-group favoritism towards Berlusconi.  
18 Specifically, we presumed that it would be expressed at the beginning of the game (as higher  
19 amounts of initial investments), and persistent throughout the game in the trend of their  
20 investments (as a lack of adjustment to the trust/distrust condition) when they play with  
21 Berlusconi, as compared to Angela. Regarding the opposing group of voters, we expected out-  
22 group derogation towards Berlusconi, reflected in a lower amount of initial investments (as  
23 compared to Angela) that will also persist throughout the game in the trend of their investments  
24 (as lack of adjustment to the trust/distrust condition). Alternatively, we expected an evidence-  
25 based behavior correspondent with the condition of the game, irrespective of the partner, since  
26 none has the potential to instigate the in-group related favoritism.

## 27 2. Materials and Methods

### 28 (a) General Procedure

29 The study was carried out in accordance with the 1964 Helsinki Declaration. In addition, the  
30 study was approved by the Institutional Review Board at the Scientific Institute for Research  
31 Hospitalization and Health Care – Santa Lucia Foundation in Rome, Italy. Recruitment included:  
32 phone-mobilization of volunteers, on-site collection of students, and peer-to-peer nomination of  
33 classmates with a clear political interest and orientation. Selection concluded with an informed  
34 consent following a detailed account of the procedure by the experimenter, and signed assent  
35 by the admitted candidates. The study was conducted at the Department of Psychology,  
36 "Sapienza" University of Rome. The laboratory was equipped with standard air-conditioning  
37 system (temperature maintenance) and illumination (lighting sustenance), chair and an LCD  
38 monitor (head positioning at 0.5m approximate distance), E-Prime (Psychology Software Tools,  
39 Inc., Pittsburgh, PA) for experiment creation, and a PC workstation for experiment execution.

### 40 (b) Participants

41 Selected candidates belonged to the same national (Italian) and ethnic (Caucasian) group. All  
42 of them were students at one of two universities, the public "Sapienza", or the private Libera  
43 Università Internazionale degli Studi Sociali "Guido Carli", in Rome. A total of 124 participants  
44 were split into the RW or LW groups according to their responses on the Explicit Political  
45 Orientation Questionnaire, and completed the experimental procedure. A set of 121 candidates  
46 from the total were included in the survey-analysis (Exp1/Exp2 = 60/61) after exempting three  
47 who declared as being apolitical, while 118 candidates were included in the analysis of the  
48 economic behavior (Exp1/Exp2 = 60/58) after exempting additional three who did not believe in

1 the cover story. Participants were stratified for political orientation (LW/RW = 60/58), sex (M/F  
2 = 2/1) and age (LW/RW = 22.62/23.35 years).

### 3 (c) Procedure

4 **Participants' self-reported ideology.** Participants' political orientation was measured via  
5 direct question i.e., by asking them to self-place on a 7-point Likert-type item (1="extremely  
6 left"; 2="left"; 3="center-left"; 4="center-right"; 5="right"; 6="extremely right", 7="apolitical").  
7 According to the responses, participants were then split in two groups, with the LW-group  
8 consisting of voters who assigned scores from 1 to 3 on the self-placement scale, while the RW-  
9 group of voters who self-assigned scores ranging from 4 to 6. Those who rated themselves as  
10 apolitical (i.e., selected "7") were excluded from the experiment. We also introduced several  
11 control questions asking participants to specify the voted party preference at the last three  
12 consecutive elections (in order to make sure that selected participants had clear idea regarding  
13 their own political orientation), and to specify how often and to whom they talk about politics (in  
14 order to have an extra measure about participants' interest in politics). **The questions regarding  
15 the past voting behavior were introduced for the purpose of excluding participants who did not  
16 have clear idea about their political orientation and gave conflicting responses (e.g., self-identified  
17 as pro-left, while reported voting for pro-right political party, and vice versa).**

18 **Participants' moral values and social attitudes.** Participants completed a computerized battery  
19 of questionnaires that helped to support the cover story and to provide information about their  
20 moral values and social attitudes. The questionnaire data helped to support the cover story  
21 and to provide information about the inferred ideology of participants. The following list of  
22 questionnaires was administered: i) *Moral Foundations Questionnaire (MFQ)*[24] with 32-items  
23 organized in five core moral dimensions (Fairness/Reciprocity, Care/Harm Sensitivity, In-group  
24 Loyalty, Authority and Purity/Sanctity) rated on a 6-point scale ranging from 0 ("not at all  
25 relevant") to 5 ("extremely relevant"); ii) *Economic System Justification Inventory (ESJI)*[25] designed  
26 to assess the tendency to "legitimize economic inequality" through 17 items rated on a 1-9  
27 Likert scale; iii) *Right-Wing Authoritarianism (RWA)*[10] with 10 items measuring authoritarian  
28 submission, approval of authoritarian aggression and conventionalism on a 1-7 Likert Scale;  
29 iv) *Social Dominance Orientation (SVD)*[26] with 10 items measuring preference for in-group  
30 dominance on a 1-7 Likert Scale; v) *Social Value Orientation (SVO)*[27] presented in six forced  
31 choices of self-other resource allocations and obtained with a slider-meter in order to yield a  
32 single-score for the rank-order of participant's social preferences i.e., the magnitude of concern  
33 that each participant had for others. Detailed account and statistics are provided in SI "Evaluation  
34 of Trustors".

35 **Cover story behind the trust game.** A cover story was designed to deal with the fact that  
36 the real inclusion of a famous character in the role of a trustee in an experimental setting  
37 is hardly ever possible. It informed the participants about "a mathematical model" that  
38 performed a psychological/ideological assessment of the real trustor (from their responses to  
39 the questionnaires), and on the basis of match/mismatch with the trustee's profile, calculated  
40 trustee's responses to specific offers. Constructed as such, the cover story allowed us to: ensure  
41 an *ecological reference* (by providing logical sense to a computer-guided economic exchange) and  
42 produce *credence* (by scaling-down partisan relations to one-on-one interaction, and zooming-in  
43 on follower-leader communication in the form of trustor-trustee series of actions and reactions).

44 **Trustees.** The experiments were conducted throughout 2014, in two consecutive periods (Exp  
45 1: January-July and Exp 2: October-December), with the use of two famous characters in the  
46 role of trustee as a main difference. Specifically, the main experiment (Exp 1) utilized Silvio  
47 Berlusconi, former Prime Minister of Italy and leader of the center-right parties' coalition, while

1 the control experiment (Exp 2) utilized Piero Angela, a famous TV host. We conducted our main  
2 experiment over the course of one semester, for the purpose of avoiding unexpected political  
3 developments which could affect the public image, and result with fluctuations in the public trust-  
4 index toward Berlusconi. In order to control for a potential seasonal confound, we also consulted  
5 public electoral and political polls (managed by the Presidency of Ministers and the Italian  
6 Department of Information and Publishing<sup>1</sup>). Only one agency ("IPR Marketing") provided  
7 reports throughout the whole year (December 2013, May 2014, December 2014). According to  
8 these reports trust-index toward Berlusconi proved to be fairly consistent for the investigated  
9 period (25%, 23% and 20% respectively). The obtained results, confirmed that Berlusconi carried  
10 potential to arouse, sensitize and polarize the audience and as such was suitable to be chosen  
11 as experimental stimulus. [4, 28, 29]. In order to choose a control stimulus who would be  
12 a better fit in terms of political neutrality and high popularity, we conducted a pilot online  
13 survey on an independent sample of 42 students, assessing two acclaimed national television  
14 hosts, Piero Angela (86yr) and Gerry Scotti (59yr). Both stimuli were selected for their high  
15 popularity and relatively close age to Berlusconi. Neither of the stimuli was an acclaimed  
16 politician or has been publicly associated with the Italian politics. Participants were asked to  
17 decide if each of the TV-hosts is taking a political side (i.e., to quantify the political orientation  
18 of the stimulus) and if so, which side they are taking (i.e., to qualify the political orientation of  
19 the stimulus). The former question was rated on a 5-point Likert-scale (grading from 1= "not at  
20 all" to 5 = "very much"), while the later was rated on a 7-point Likert-scale (1="extremely left";  
21 2="left"; 3="center-left"; 4="center-right"; 5="right"; 6="extremely right", 7="apolitical"). In our  
22 analysis, we performed a unique index of the two measures by scaling participants' scores on  
23 each question, and calculating the overall political polarization of the stimulus as the distance  
24 from the center (where 0.0 = "center" signifies the absence of political polarization, while 3.5  
25 signifies highest political polarization). Two separate t-tests for each stimulus' ratings on political  
26 polarization were performed against zero, and both proved to be significant (Scotti:  $t(39) =$   
27  $7.14, p < .001$ ; Angela:  $t(38) = 6.41, p < .001$ ), meaning that no stimulus could be perceived as  
28 absolutely neutral. However, the t-test for paired samples showed a significant difference on  
29 the ratings attributed to Scotti's and Angela's political polarization ( $t(39) = 2.64, p < .05$ ), with  
30 Scotti receiving an average score of 0.51, while Piero Angela a score of 0.31. Considering that  
31 the complete absence of political polarization was rated as 0.0, while the maximal polarization  
32 was 3.5, both characters were minimally polarized. We opted for Angela as a significantly better-  
33 fitted control, both in terms of closer age and lower political polarization. In addition, we did  
34 not expect considerable fluctuation in the public perception of Angela, because he is a famous  
35 non-politician with long-term media presence, but stable public appearance. Hence, we were  
36 not restricted by the period and conducted our Exp. 2 in the second half of 2014. However, in  
37 order to control for the potential seasonal confound, we relied on our studies (since there are no  
38 available public perception polls for Angela). Namely, in our pilot (conducted at the beginning  
39 of 2014) and the experimental study (conducted toward the end of 2014), the participants on  
40 both sides of the political spectrum, did not differ significantly in their perception of Angela and  
41 considered him as a relatively neutral character. The final choice of control and main stimulus was  
42 further verified in each of the following dimensions: Dominance, Competence, Acquaintance,  
43 Positive and Negative Valence. As expected both groups did not differ in the assessment of  
44 Angela, but they did in the assessment of Berlusconi on Competence, Acquaintance, Positive and  
45 Negative Valence. Importantly, there was no evident between-group distinction in the ratings for  
46 Dominance, since both groups assigned higher scores to Berlusconi on that dimensions. Detailed  
47 account and statistics are provided in SI "Evaluation of Trustees".

48 **Trust game procedures.** In our version of the TG, participants were asked to make an offer to  
49 the trustee (Silvio Berlusconi, the RW political leader; or Piero Angela, the famous TV host) in 15  
50 rounds. In each round, participants could send to the trustee any amount between 1 and 10 euros.

<sup>1</sup> Accessed through the website <http://sondaggipoliticoelettorali.it/>



1 They knew that the invested amount would be quadrupled and that the trustee could decide to  
 2 return half of the total or nothing at all. As a cover story, each participant was informed that the  
 3 return offer of the trustee would correspond to their profile and actual behavior, as determined  
 4 by a simulation algorithm. In reality, the trustee return behavior depended on whether the  
 5 participants were unknowingly assigned to a pre-arranged trust (with trustee reciprocating in  
 6 80% of the trials) or distrust TG version (with trustee reciprocating in 20% of the trials). Details  
 7 are provided in SI Experimental Design. Even though participants performed 15 rounds they  
 8 were not informed about the total number of TG rounds in order to avoid the development of  
 9 gain-benefit strategies. Detailed account is provided in SI “Methods: Experimental design”.

10 **Manipulation check and briefing.** Participants were told that one of the rounds will be  
 11 randomly selected and paid in addition to the standard rate for participation in the experiment.  
 12 In reality, each player received a fixed bonus rate due to the lack of a real mathematical model.  
 13 The procedure concluded with a survey addressing participants’ trust in the cover story without  
 14 disclosing or suggesting the aim of the study in advance. The manipulation check procedure  
 15 was carefully designed and it started with the following indirect questions: “According to you  
 16 what is the scope of the experiment?” (to which participants provided written explanations)  
 17 and “Was the mathematical model predictive of Trustee’s behavior?” (to which they responded  
 18 by using a 0-100 VAS scale). The participants who indicated predictability of the mathematical  
 19 model lower than 30% (the cutoff value), were again asked to provide written rationale for their  
 20 reasoning. At the end, participants whose summary answers on all three questions implied that  
 21 they guessed the real aim of the experiment, were directly asked whether they believe in the cover  
 22 story. A negative response was taken as the main reason for exclusion of the participant from the  
 23 analysis of the economic behavior. The participants who were included (i.e., believed in the story  
 24 about “the mathematical model”), were surveyed regarding the reliability of “their partner” in  
 25 the game. Hence, they provided post-experimental evaluation of how un/trustworthy was the  
 26 Trustee during the game (on a 0-100 VAS scale). All participants were debriefed and informed  
 27 about the background procedure and the real scope of the experiment.

### 28 3. Results

#### 29 (a) Self-reported ideology as indicator of economic behavior

30 In order to investigate the level of initial trust expressed through the amount of investment in  
 31 the first trial, we performed a 2 x 2 ANOVA with the Group (LW/RW) and Trustee (SB/PA)  
 32 as between-subjects factors, while the initial investment was taken as a dependent variable.  
 33 Contrary to our hypotheses regarding the initial investments, we did not find a significant double  
 34 interaction  $F(1, 114) = .95, p = .331$ , meaning that at the beginning of the game, the two groups did  
 35 not differ significantly in the money they invested in either SB or PA.

36 To explore the overall dynamics of trust we employed linear mixed effects modeling (LME)  
 37 with the R package “lme4”, fit by maximum likelihood t-tests using Satterthwaite approximations  
 38 to degrees of freedom. This approach allowed us to thoroughly investigate the relationship  
 39 between the economic behavior indexed by the average amount of investment offered by  
 40 participants at each trial and their self-reported political orientation (LW/RW). Therefore, we  
 41 specified several models of increasing complexity with the simplest as a random-intercept model,  
 42 allowing only between-subject variance in the average investment. The full model had the  
 43 following fixed effects: Trial N<sup>o</sup> (1-15), Group (LW/RW), TG Condition (trust/distrust) and  
 44 Trustee (SB/PA) (with interaction term). Participants were always treated as random effects  
 45 with varying intercepts. The model selection relied on Akaike Information Criterion (AIC) and  
 46 Likelihood Ratio (LR).

47 The results revealed that the full-interaction model was marked by both AIC drop from 8238.1  
 48 to 8235.8 ( $\Delta AIC = -2.3$ ), and a significant change in the LR as compared to its nested model ( $\chi^2(1)$

1 = 6.98,  $p < .01$ ). (For details see SI: “Self-reported ideology as indicator of economic behavior: Full-  
 2 interaction Model”). Thus, the full-interaction model was selected as a best fit, showing that the  
 3 economic behavior of the trustor changed as a function of the interaction between trustee’s and  
 4 own political orientation, and their mutual economic exchange. The changes in trustor’s behavior  
 5 unfolded throughout 15 exchanges, hinting at a considerable short-term plasticity of trust (Fig.2).

6 We also performed a separate LME analysis for each Group (LW/RW) and Trustee (SB/PA),  
 7 with Trial N<sup>o</sup> (1-15) and TG Condition (trust/distrust) as fixed effects, and participants as random  
 8 effects of varying intercepts, in order to observe the extent to which changes in trustors’ economic  
 9 behavior could be attributed to the condition when playing with the two trustees (SB/PA). Results  
 10 showed that for LW-participants the confidence intervals in the investigated interaction did not  
 11 include zero when playing either with Berlusconi ( $b = -0.27$ , 95% CI;  $-0.36, -0.18$ ) or with Angela ( $b$   
 12  $= -0.19$ , 95% CI;  $-0.29, -0.10$ ). This interaction indicated that there was a difference in the economic  
 13 behavior between the two TG Conditions in the LW-group regardless of whether they played with  
 14 Berlusconi or Angela, meaning that they adjusted their behavior (by increasing or decreasing their  
 15 offers throughout the game) according to the unfolding of the putative behavior of each trustee.  
 16 In contrast, the RW-group did not differentiate in their behavior during the task when playing  
 17 with Berlusconi ( $b = -0.08$ , 95% CI;  $-0.19, 0.03$ ) but they did when playing with Angela ( $b = -0.27$ ,  
 18 95% CI;  $-0.38, -0.16$ ) (Fig. 3).

19 In order to explore if participants’ economic behavior (throughout the game) was coherent  
 20 with their overall impression about their partners’ trustworthiness (measured at the end of the  
 21 game), we ran a  $2 \times 2 \times 2$  ANOVA with the Group (LW/RW), TG Condition (trust/distrust)  
 22 and Trustee (SB/PA) as between-subjects factors (i.e., independent variables), and ratings on  
 23 Perceived Trustworthiness (0-100 VAS) as a dependent variable. This analysis did not result in  
 24 a significant triple interaction  $F(1,109) = .88$ ,  $p = .351$ , showing that the two groups did not  
 25 differ significantly in the explicit trustworthiness ratings of their respective partners and for the  
 26 respective conditions. We did find a significant main effect of the trust/distrust TG condition  $F(1,$   
 27  $109) = 47.129$ ,  $p < .001$ , showing that both groups attributed higher/lower trustworthiness ratings  
 28 to the respective version of the game. The post-experimental evaluation of the overall behavior of  
 29 the trustee confirms that participants were explicitly aware of the trustee’s behavior.

### 30 (b) Group binding dimension as possible indicator of economic behavior

31 In order to investigate the relationship between participants’ economic behavior and their  
 32 potential group-leader related bias, we repeated the LME analysis by substituting self-reported  
 33 Group (LW/RW) with data obtained from previously completed questionnaires on their  
 34 moral values and social attitudes. First, we performed a principal component analysis (PCA)  
 35 with varimax orthogonal rotation on nine variables with the following Cronbach reliability  
 36 coefficients: Harm (.81), Fairness (.78), Loyalty (.79), Authority (.75), Purity (.76) from the  
 37 Moral Foundations Questionnaire (MFQ), and Right-Wing Authoritarianism (RWA = .72), Social  
 38 Dominance Orientation (SDO = .73), Economic System Justification (ESJ = .74), and Social Value  
 39 Orientation (SVO = .80). Overall, reliability analysis returned a general score of .79 with a range  
 40 from .73 to .81 for separate items.

41 The analysis of the eigenvalues revealed a two-factor structure that explained 62.77% of the  
 42 total variance. The first factor accounted for 41.23% of the variance and the variables with the  
 43 highest loadings in this group are listed as follows: MFQ Purity (.85), MFQ Authority (.83),  
 44 RWA (.78) and MFQ Loyalty (.70). The second factor was mainly loaded by: MFQ Fairness (.85),  
 45 SDO (-.75), MFQ Harm (.71), ESJ (-.62). In line with previous literature on ideology-inferred  
 46 differences from moral foundations and social attitudes [9, 24, 30], the first factor was named  
 47 Group Binding Dimension, since it comprised binding moral values together with the RWA  
 48 attitudes, thus tapping onto the social conformity construct. The second factor was named Social  
 49 Equality Dimension, since it comprised the remaining moral values concerned with fairness and  
 50 harm reduction (individualizing MFQ variables), decreased proneness to hierarchy (SDO) and  
 51 legitimization of economic inequality (ESJ), thus tapping onto the social equality construct. As

1 previously demonstrated [12], the first factor is associated with group-centrism and possible  
2 group-related favoritism, so we decided to proceed with the investigation on the interaction  
3 between the degree of Group Binding Dimension and the economic behavior of voters indexed  
4 by the average amount of investment.

5 Specifically, we decided to repeat the aforementioned LME with only one procedural  
6 modification: the self-reported political group in the full model i.e., Group (RW/LW) was  
7 substituted with the score on the Group binding dimension (extracted with PCA from the  
8 questionnaires and used as a single-item measure i.e., independent variable), since the correlation  
9 between the two variables was statistically significant ( $r = 0.71, p < .001$ ). Again, the full-  
10 interaction model was selected as a best fit, both in terms of overall AIC drop from 8316.4 to  
11 8247.9 ( $\Delta\text{AIC} = -68.5$ ) and marginal LR ( $\chi^2(1) = 2.73, p = .098$ ). Thus, results showed that the  
12 economic behavior of the trustor changed as a function of the interaction between trustor's  
13 score on Group binding dimension and the trustee's political orientation, unfolding over the  
14 course of the economic exchange. Mirroring previous results, the lack of modulation towards the  
15 conservative leader between two conditions of the TG was higher for people who scored higher  
16 on the Group binding dimension. (For details see SI: "Group binding dimension as indicator of  
17 economic behavior: Full-interaction Model").

## 18 4. Discussion

19 The trust-game dynamics between the political leaders and their devoted followers, occurs on  
20 a daily basis. The leaders usually assume a role of trustworthy subjects, by offering economic  
21 incentives (investments, credits and other financial benefits) to their trusting followers. In  
22 addition, the trust-game dynamics is also reflected in the fact that each voter is also a tax-payer  
23 (i.e., trustor), while the political leaders with governmental experience are decision-makers (i.e.,  
24 trustees). They can choose to spend the budget for societal improvements (thus returning the  
25 trust and behaving trustworthy), or for their own benefits (thus behaving in an untrustworthy  
26 manner). Our approach allowed us to shed light on important aspects of these voter-leader  
27 interactions. We demonstrated that when it comes to supporting voters and their perception of  
28 an in-group political leader, bias may not manifest at the very beginning, but it can certainly  
29 become evident toward the end of a trust-based economic interaction. Specifically, we observed  
30 a clear difference in the overall behavior between our two experimental groups when playing  
31 with an in-group/out-group political leader (SB), as compared to playing with a neutral control  
32 (PA). Namely, we found that while opposing voters (in our case LW-group) adjust the amount  
33 of their investment according to the behavior of both SB and PA, supporting voters (in our case  
34 RW-group) failed to adjust when playing with SB, but did so when playing with PA. The lack of  
35 adjustment in the group who played with their own leader occurred despite the fact that they  
36 were indeed explicitly aware of his behavior (as confirmed by the post-experimental evaluation  
37 of the overall behavior of the trustee).

38 Our central finding (related to the lack of adjustment in the group who played with  
39 their un/trustworthy political leader) provides evidence beyond the existing literature on the  
40 intergroup ideological bias (i.e., the automatic preference for the members of one's own political  
41 group), guided by the preference for one's own political leader. Also, it supports the so-called  
42 "epistemic spillover", a flawed heuristic of trusting like-minded political figures in non-political  
43 matters (in this case, economic trust decisions in an interactive game). Moreover, our findings  
44 suggest the mechanisms that are at the core of ideological intergroup biases, by highlighting the  
45 role of two important dimensions, especially prominent in RW-voters: *a) the strong group-binding*  
46 *moral values* and *b) the respect for the in-group authority figures (i.e., powerful leaders)*.

47 There are studies providing ample neural [31] and behavioral [32, 33, 34] evidence that  
48 voters from both sides of the political spectrum are not bound by cold rationality when making  
49 judgments about their political peers. Our results expand on previous literature showing that,  
50 at least on the explicit level, both groups of trustors were able to discriminate the behavior  
51 of the trustee. Namely, they were able to discern whether the trustee reciprocated their offers,

1 as indexed by the lack of significant differences between the groups in the assessment of both  
2 characters (PA and SB) and measured through the post-experimental evaluations of the trustors.  
3 However, we observed clear differences in the economic behavior of voters who played with their  
4 in-group leader as indexed by the significant triple interaction (Group  $\times$  Trustee  $\times$  Condition)  
5 of the mixed-model analysis. Furthermore, a more in-depth analysis of moral values and social  
6 attitudes on our sample of voters (obtained with principal component analysis on a battery of  
7 self-reported surveys) suggests that the stronger admiration for the authority of one's leader,  
8 and the strong loyalty to one's group could be the leading mechanisms for the emergence of  
9 the bias [28, 35]. These results are in line with the Social Identity Theory regarding expressive  
10 partisan identity [7], the Moral Foundation Theory (MFT) and the Right-Wing Authoritarianism  
11 Theory (RWA) [8, 9, 10, 24]. According to MFT, the five basic moral foundations (harm/care,  
12 fairness/reciprocity, in-group/loyalty, respect/authority and purity/sanctity), collapse into two  
13 super-ordinate foundations. Specifically, the first couple of values are labeled as individualizing  
14 foundations (generally oriented toward protection and fair treatment of individuals), while  
15 the remaining three as binding foundations (focused on protection of the group, collectives,  
16 institutions). The binding foundations include: a) patriotism and self-sacrifice for one's group  
17 (in-group loyalty); b) concerns about the importance of social order, traditions and respect for  
18 leadership (respect/authority) and; c) the prevalence of spiritual over the carnal nature of humans  
19 (purity/sanctity). The political identity largely shapes people's moral foundations, with LW-  
20 voters endorsing the individualizing foundations, while RW-voters ascribing same or higher  
21 moral relevance to the binding foundations. The latter group of values have been examined in  
22 the context of immorality i.e., "unacceptable behavior, such as blind obedience and stigma" [9].  
23 In our experiment, the observed lack of modulation in trust-based economic behavior towards  
24 the conservative leader was stronger in people who scored higher on the well described Group  
25 binding dimension. This dimension has been built upon the scores from the binding set of moral  
26 values (like loyalty for one's group and respect toward own authority figures with concern for  
27 religious purity matters), and RW-authoritarian social attitudes (i.e., authoritarian submission,  
28 tolerance for authoritarian aggression and conformism as defined in RW authoritarianism scale).

29 These findings also bring additional evidence for the existing claim that liberal-conservative  
30 differences in moral intuitions could be due to authoritarianism dimension i.e., they happen  
31 because conservatives' greater valuation of their group, traditions and conventions and norms  
32 are attributable to their generally high levels of proneness to authority figures [12]. Indeed, in  
33 our experiment the strong partisan affiliation emanated through the persona of a charismatic,  
34 dominant leader [36], even if incidental, was still the case when playing with SB. In relation to  
35 this, Schilke et al., have already demonstrated that the power-disadvantaged would be inclined  
36 to perceive the power-holders in a positive light, even when such belief is not supported by  
37 reliable evidence [37]. Such conclusions should hold special truth for individuals who show  
38 higher awareness of the hierarchical arrangements and attribute greater importance to authority  
39 figures, as is the case with RW-partisans. The observed behavior of supporting voters when  
40 playing with their influential leader, is also in line with our earlier finding on the gaze-  
41 attracting power of SB. Namely, a RW-group was less able to suppress the automatic tendency  
42 to follow SB's gaze in comparison to a LW-group [4], an effect linked to his political power [28].  
43 Improved understanding may come from studies using advanced tools that would allow more  
44 realistic interaction with a leader (like immersive virtual reality), and provide more insightful,  
45 computational models (via machine learning), or neurophysiologic correlates (via fMRI) for data  
46 analysis and interpretation.

47 In an analogous fashion, voters can "use the perceived credibility of political figures as a  
48 heuristic to guide their evaluations" of what is right or wrong, and decisions of whether to trust  
49 or not i.e., the effect known as "epistemic spillover" [13, 14]. Accordingly, our previous studies  
50 have already shown that the perceived similarity between voters' and leaders' personality, can  
51 influence even the basic cognitive processes of voters, such as attentional gaze capture [4, 16, 28].  
52 Our current experiment provides more direct evidence, showing that voters' shared political

1 ideology with an in-group political leader “spills over” to their economic decision-making  
2 processes in a trust economic game (i.e., unrelated, non-political context).

3 The study casts light on a number of additional issues concerning the understanding  
4 of individuals and group dynamics. The first is the extent to which trust toward a political  
5 leader is defined by voter-leader interchange. The second is the extent to which the voter-leader  
6 interchange relies on the influence of *situational factors*, in our case an online and dynamic version  
7 of the trust game. The third is the extent to which trust toward a political leader is determined by  
8 *dispositional factors*, in our case voters’ moral values and social attitudes, leading to its sustenance  
9 and behavioral resistance to change. Our results show that depending on the Group binding  
10 dimension, the voter-leader relation embedded in trustor-trustee economic interaction can either  
11 be a dynamic construct with situational attributions, or a fairly static construct with dispositional  
12 attributions. Importantly, when it comes to voter-leader relations, trust can be enlightening for  
13 some, but it can be just as blinding for others. We might argue that it is intuitive to expect that one  
14 will act irrationally when s/he is ideologically biased. In fact, supporting voters (i.e., RW-group)  
15 behaved in line with this reasoning: they were not able to adjust to un/trustworthy behavior of  
16 their in-group leader, i.e., Berlusconi. We might also argue that it is counter-intuitive to expect that  
17 one will act rationally when s/he is ideologically biased. In our experiment, opposing voters (i.e.,  
18 LW-group) behaved rationally in spite of this reasoning: they adjusted their economic behavior  
19 to the un/trustworthy behavior of the out-group leader Berlusconi. The behavior of LW-group  
20 might be attributed to the fact that they were not playing with an in-group leader. Here, we want  
21 to highlight the fact that the behavior of the RW-group towards an in-group leader, does not call  
22 for parallels or conclusions regarding the behavior of the LW-group towards a hypothetical in-  
23 group leader. In fact, at this point, it remains unclear whether an ideological asymmetry will  
24 emerge, even though groups differ in the Group binding dimension. Therefore, we strongly  
25 support replication of the experiment in a nation with a strong LW-leader. In Italy we could not  
26 recognize a single LW-leader who embodies all required qualities to be considered as Berlusconi’s  
27 equivalent. Namely, the dimensions which are deemed crucial to control in the choice of a  
28 popular LW-leader are the following: long-term political presence and governmental leadership  
29 experience (e.g., a leader of coalition party or a Prime Minister of the country); persisting  
30 popularity via continuous public media appearance; clear perception regarding leader’s political  
31 orientation i.e., a person with unambiguous political categorization. Indeed, all elected Italian  
32 LW-leaders differ from Berlusconi in something more than ideology. For instance, the Italian  
33 Prime Minister at the time of the experiment, the much younger LW-leader Matteo Renzi, was  
34 not elected by citizens, but chosen by the President of Republic with mandate to form a technical  
35 administration. Also, he lacked long-term political presence and media appearance. On the other  
36 hand, the career of the LW-politician Romano Prodi, is indeed marked with long-term political  
37 presence (Prime Minister in the periods of 1996-1998 and 2006-2008) which is comparable to  
38 Berlusconi’s leadership experience (Prime Minister in the periods of 1994-1995, 2001-2006 and  
39 2008-2011). However, he lacks ongoing public exposure and media appearance (since his decade-  
40 long retirement from Italian politics). **Future studies with longitudinal explorations (spanning  
41 across multiple seasons), and diverse geopolitical settings (especially countries with a strong left-  
42 wing equivalent), will shed important light on the subject.** Specifically, studies on other leaders  
43 with matching years of political presence, leadership experience, and media appearance, can help  
44 to address the question about the power that an in-group (conservative or liberal) leader exerts  
45 on his followers.

46 In conclusion, by investigating direct voter-leader trust-based economic exchange, our study  
47 provides novel empirical evidence that the power of the political leader on his/her electors  
48 does not rely merely on the perceptions about his unprecedented authority, but also on biased  
49 perceptions of whether s/he is trustworthy. Ultimately, these findings can contribute to an  
50 advanced understanding of media campaigns and electoral outcomes. Thus, the study carries  
51 potential to help improve democracy in the modern-day human societies.

## 5. Figures

**Caption for Fig. 1: Study-specific protocol of the Trust Game (TG).** Each participant is randomly assigned to play one TG version (trust/distrust) with one Character (control/experimental) and endowed with 10 euros that are “renewed” on each of the 15 trials. Each trial begins with a fixation cross (1s), followed by image-presentation of the character<sup>2</sup>. The trustor’s decision is marked with selection of the corresponding offer (untimed) and followed by calculation of the quadrupled investment (1s). The trustee’s decision is revealed after a pause (4s) during which the supposed mathematical model computes trustee’s behavior. The trial ends with the final payoff for the participant.

**Caption for Fig. 2: Illustration of participants’ offers (in blue those of the right-wingers; in red those of the left-wingers)** plotted according to the Trial N<sup>o</sup> (1-15), Group (LW/RW), TG Condition (trust/distrust) and Trustee (SB/PA). The colored areas mark 95% CI.

**Caption for Fig. 3: Chronological visualization of TG dynamics.** The average amount of investment in euros (y-axis) is plotted against the sequence of trials (x-axis). The pairs of curves correspond to the trust/distrust conditions of the game, per each group (RW/LW) and trustee (SB/PA). The resulting trial-by-trial overview displays observed (dashed lines) and modeled/predicted economic behavior (solid lines). \*\*\*  $p < .001$

**Ethics:** The study involved only human participants, and no animals were employed for the purpose of this research. It was carried out in accordance with the 1964 Helsinki Declaration for Research Ethics. In addition, the study was approved by the Institutional Review Board at the Scientific Institute for Research Hospitalization and Health Care – Santa Lucia Foundation in Rome, Italy (IRB Protocol: CE/AG4-PROG.191-71). All participants have agreed to participate, and have signed an informed consent providing detailed account of the procedure.

**Data Accessibility:** Our dataset and codes are publicly available at Open Science Framework repository and they can be retrieved from the following address: [osf.io/nygs6](https://osf.io/nygs6)

**Authors’ contributions:** B.G., M.T.L., G.P., G.V.C. and S.M.A. designed research; B.G. performed research; B.G., M.T.L., G.P. and S.M.A. planned analyses; B.G., M.T.L. and G.P. performed analyses; all authors wrote the paper and contributed to revisions.

**Competing interests:** The authors **declare no competing interest** with respect to the research, authorship, financing and publication of this article, or any other conflict of interest whatsoever.

**Permission to carry out fieldwork:** **No special permissions were required** prior to the conducting of the research.

**Funding:** The research was supported by the grants of national research interest (PRIN: Progetti di Ricerca di Rilevante Interesse Nazionale, Edit. 2015, Prot. 20159CZFJK and Edit. 2017, prot. 2017N7WCLP), as well as the ERC Advanced Grant, 2017 (eHONESTY, 789058).

**Acknowledgments:** We are grateful to Maria Serena Panasiti for helpful suggestions, Adriano Acciarino and Gianluca Angeli for their help in data collection. **Also, we want to express our gratitude to the anonymous reviewers for their diligent revision and substantial contribution in the improvement of the manuscript.**

<sup>2</sup>Analogous images of trustees include RW leader Silvio Berlusconi (published by European People’s Party) and TV host Piero Angela (published by Elena Torre), released under Creative’s Commons license, downloaded from Flickr and adjusted in GIMP by the authors.

## References

- 1 Willis J, Todorov A. 2006 First impressions: Making up your mind after a 100-ms exposure to a face. *Psychol. Sci.* 17(7):592–598. (doi: 10.1111/j.1467-9280.2006.01750.x).
- 2 Winston JS, Strange BA, O’Doherty J, Dolan RJ. 2002 Automatic and intentional brain responses during evaluation of trustworthiness of faces. *Nat. Neurosci.* 5(3):277–283. (doi: 10.1038/nn816).
- 3 Avenanti A, Sirigu A, Aglioti SM. 2010 Racial bias reduces empathic sensorimotor resonance with other-race pain. *Curr. Biol.* 20(11):1018–1022. (doi: 10.1016/j.cub.2010.03.071).
- 4 Liuzza MT, et al. 2011 Follow my eyes: the gaze of politicians reflexively captures the gaze of ingroup voters. *PLoS ONE* 6(9):e25117. (doi: 10.1371/journal.pone.0025117).
- 5 Fitzgerald CJ, Wickwire JH. 2012 Religion and political affiliation’s influence on trust and reciprocity among strangers. *Evol. Behav. Sci.* 6(2):158–180. (doi: 10.1037/h0099217).
- 6 Huddy L 2015 Group Identity and Political Cohesion in *Emerging Trends in the Social and Behavioral Sciences*. John Wiley & Sons, Inc. doi: 10.1002/9781118900772.etrds0155.
- 7 Huddy L, Mason L, AarÅye L. 2015 Expressive Partisanship, Campaign Involvement, Political Emotion, and Partisan Identity. *Ann. Polit. Sci. Rev.* 109(1):1–17. (doi: 10.1017/S0003055414000604).
- 8 Haidt J, Graham J. 2007 When Morality Opposes Justice: Conservatives Have Moral Intuitions that Liberals may not Recognize. *Soc. Justice. Res.* 20(1):98–116. (doi: 10.1007/s11211-007-0034-z).
- 9 Graham J, Haidt J, Nosek BA. 2009 Liberals and conservatives rely on different sets of moral foundations. *J. Pers. Soc. Psychol.* 96(5):1029–1046. (doi: 10.1037/a0015141).
- 10 Altemeyer RA 1981 *Right-Wing Authoritarianism*. Univ of Manitoba Press, Winnipeg.
- 11 Federico CM, Weber CR, Ergun D, Hunt C. 2013 Mapping the Connections between Politics and Morality: The Multiple Sociopolitical Orientations Involved in Moral Intuition. *Polit. Psychol.* 34(4):589–610. (doi: 10.1111/pops.12006).
- 12 Kugler M, Jost JT, Noorbaloochi S. 2014 Another Look at Moral Foundations Theory: Do Authoritarianism and Social Dominance Orientation Explain Liberal-Conservative Differences in “Moral” Intuitions? *Soc. Justice. Res.* 27(4):413–431. (doi: 10.1007/s11211-014-0223-5).
- 13 Marks J, Copland E, Loh E, Sunstein CR, Sharot T. 2018 Epistemic spillovers: Learning others’ political views reduces the ability to assess and use their expertise in nonpolitical domains. *Cognition*. (doi: 10.1016/j.cognition.2018.10.003).
- 14 Swire B, Berinsky AJ, Lewandowsky S, Ecker UK. 2017 Processing political misinformation: comprehending the trump phenomenon. *R. Soc. Open. Sci.* 4(3):160802. (doi: 10.1098/rsos.160802).
- 15 Caprara GV, Barbaranelli C, Zimbardo PG. 1997 Politicians’ uniquely simple personalities. *Nature* 385(6616):493. (doi: 10.1038/385493a0).
- 16 Caprara GV, Zimbardo PG. 2004 Personalizing politics: a congruency model of political preference. *Am. Psychol.* 59(7):581–594. (doi: 10.1037/0003-066X.59.7.581).
- 17 Berg J, Dickhaut J, McCabe K. 1995 Trust, Reciprocity, and Social History. *Games. Econ. Behav.* 1(10):122–142. (doi: 10.1006/game.1995.1027).
- 18 Putnam RD, Leonardi R, Nanetti RY. 1993 *Making Democracy Work*. Princeton University Press, Princeton, NJ.
- 19 Enemark D, Gibson CC, McCubbins MD, Seim B. 2016 Effect of holding office on the behavior of politicians. *Proc. Natl. Acad. Sci. U.S.A.* 113(48):13690–13695. (doi: 10.1073/pnas.1511501113).
- 20 Iyengar S, Westwood SJ. 2015 Fear and Loathing across Party Lines: New Evidence on Group Polarization. *Am. J. Pol. Sci.* 59(3):690–707. (doi: 10.1111/ajps.12152).
- 21 Zahedzadeh G, Merolla J. 2012 How do negative political ads impact public trust in candidates? in *The Annual Meeting of the Western Political Science*. Portland, Oregon, pp. 22–24.
- 22 Hernandez-Lagos P, Minor D. 2015 Political Identity and Trust, Social Science Research Network, Rochester, NY, SSRN Scholarly Paper ID 2635616. doi: 10.2139/ssrn.2635616.

- 23 Chang LJ, Doll BB, Van't Wout M, Frank MJ, Sanfey AG. 2010 Seeing is believing: trustworthiness as a dynamic belief. *Cogn. Psychol.* 61(2):87–105. (doi: 10.1016/j.cogpsych.2010.03.001).
- 24 Haidt J, Joseph C. 2004 Intuitive ethics: how innately prepared intuitions generate culturally variable virtues. *Daedalus* 133(4):55–66. (doi: 10.1162/0011526042365555).
- 25 Jost JT, Banaji MR. 1994 The role of stereotyping in system-justification and the production of false consciousness. *Br. J. Soc. Psychol.* 33(1):1–27. (doi: 10.1111/j.2044-8309.1994.tb01008.x).
- 26 Sidanius J, Pratto F. 2001 *Social Dominance: An Intergroup Theory of Social Hierarchy and Oppression*. Cambridge University Press, Cambridge, 1 edition.
- 27 Murphy RO, Ackerman KA, Handgraaf MJJ. 2011 Measuring social value orientation. *Judgm. Decis. Mak.* 6(8):771–781. (doi: 10.2139/ssrn.1804189).
- 28 Porciello G, Liuzza MT, Minio-Paluello L, Caprara GV, Aglioti SM. 2016 Fortunes and misfortunes of political leaders reflected in the eyes of their electors. *Exp. Brain. Res.* 234(3):733–740. (doi: 10.1007/s00221-015-4496-1).
- 29 Cazzato V, Liuzza MT, Caprara GV, Macaluso E, Aglioti SM. 2015 The attracting power of the gaze of politicians is modulated by the personality and ideological attitude of their voters: a functional magnetic resonance imaging study. *Eur. J. Neurosci.* 42(8):2534–2545. (doi: 10.1111/ejn.13038).
- 30 Altemeyer R 1996 *The Authoritarian Specter*. Harvard University Press, Cambridge, Mass.
- 31 Westen D, Blagov PS, Harenski K, Kilts C, Hamann S. 2006 Neural bases of motivated reasoning: an fMRI study of emotional constraints on partisan political judgment in the 2004 U.S. Presidential election. *J. Cogn. Neurosci.* 18(11):1947–1958. (doi: 10.1162/jocn.2006.18.11.1947).
- 32 Caruso EM, Mead NL, Balcetis E. 2009 Political partisanship influences perception of biracial candidates' skin tone. *Proc. Natl. Acad. Sci. U.S.A.* 106(48):20168–20173. (doi: 10.1073/pnas.0905362106).
- 33 Chambers JR, Schlenker BR, Collisson B. 2013 Ideology and prejudice: the role of value conflicts. *Psychol. Sci.* 24(2):140–149. (doi: 10.1177/0956797612447820).
- 34 Schepisi M, Panasiti MS, Porciello G, Bufalari I, Aglioti SM. 2019 Left threatened by right: political intergroup bias in the contemporary Italian context. *Front. Psychol.* 10:26. (doi: 10.3389/fpsyg.2019.00026).
- 35 MacWilliams MC 2016 Who Decides When The Party Doesn't? Authoritarian Voters and the Rise of Donald Trump. *PS. Polit. Sci. Polit.* 49(4):716–721. (doi: 10.1017/S1049096516001463).
- 36 Kakkar H, Sivanathan N. 2017 When the appeal of a dominant leader is greater than a prestige leader. *Proc. Natl. Acad. Sci. U.S.A.* 114(26):6734–6739. (doi: 10.1073/pnas.1617711114).
- 37 Schilke O, Reimann M, Cook KS. 2015 Power decreases trust in social exchange. *Proc. Natl. Acad. Sci. U.S.A.* 112(42):12950–12955. (doi: 10.1073/pnas.1517057112).
